# Supplementary material for: Social communication of predator-induced changes in Drosophila behavior and germ line physiology
Source: eLife journal article supplement (doi:10.7554/elife.07423), 2015-05-13

**A** MB switch flies can teach naive Histone GFP students

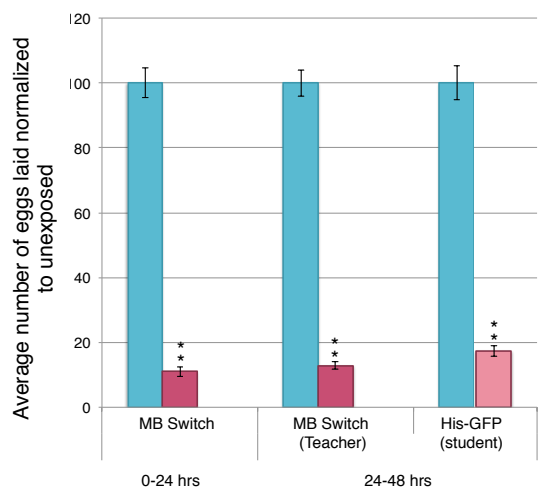

**B** Histone GFP students can teach naive MB switch students

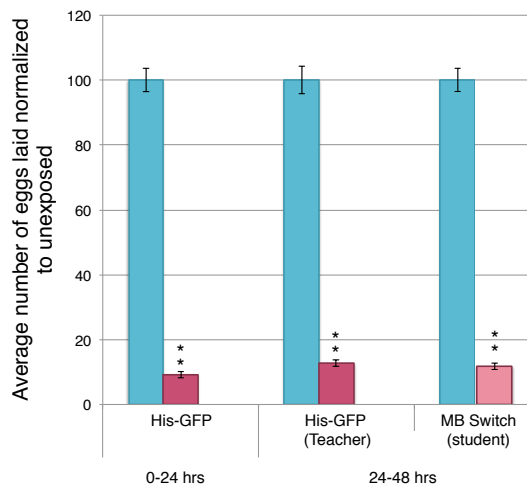

**C** MBswitch/+ can teach naive His-GFP students

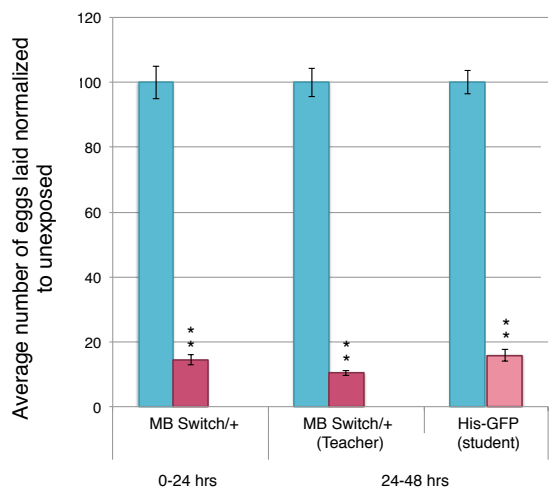

**D** Histone GFP students can teach naive MB switch/+ students

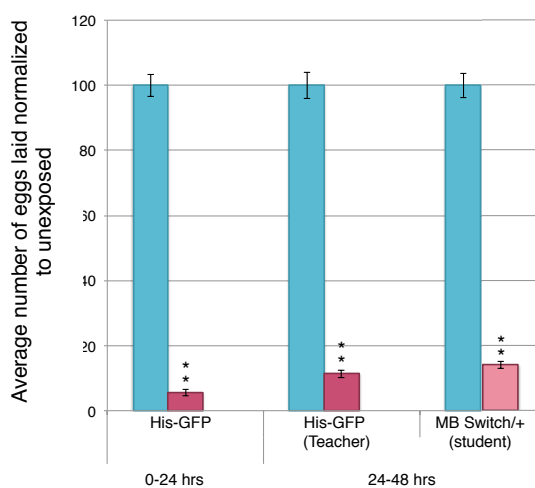

■ Unexposed  
■ Exposed  
■ Naïve

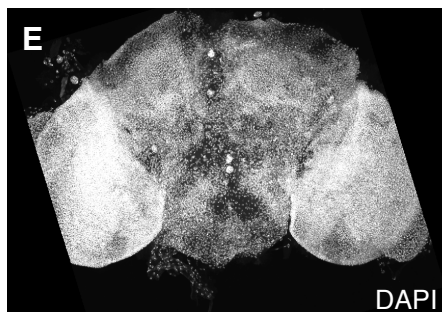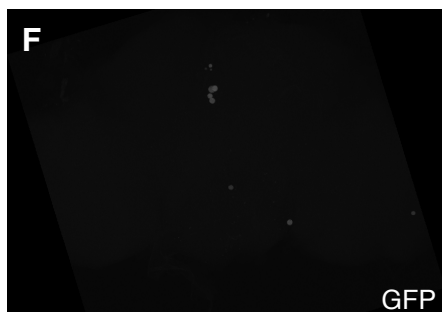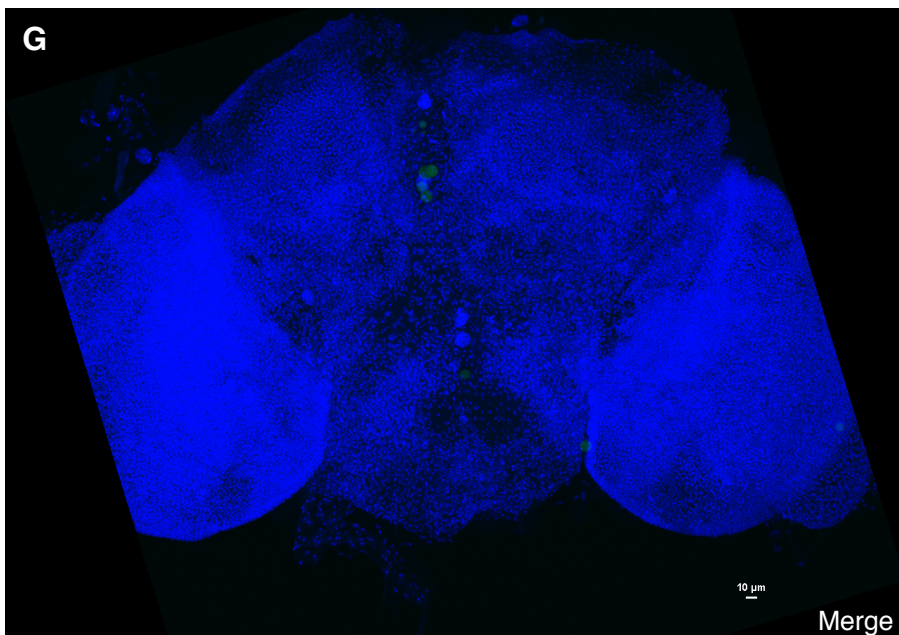

Supplement: supp [file elife-07423-supp-v2.zip]
