# Supplementary material for: Social communication of predator-induced changes in Drosophila behavior and germ line physiology
Source: eLife journal article supplement (doi:10.7554/elife.07423), 2015-05-13
Supplement: supp [file elife-07423-supp-v2.zip]

# **A** UAS-Orb2 can teach naïve His-GFP students

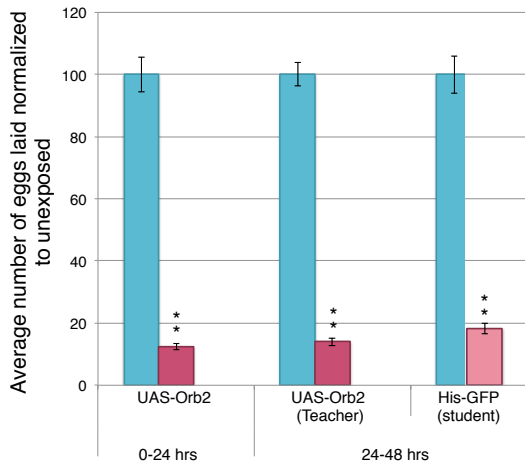

# **B** His-GFP can teach naïve UAS-Orb2 students

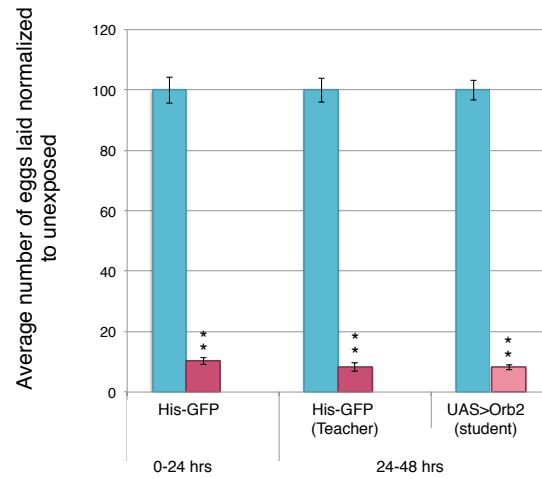

# **C** Flies expressing a white<sup>RNAi(30034)</sup> in the MB can teach naïve His-GFP

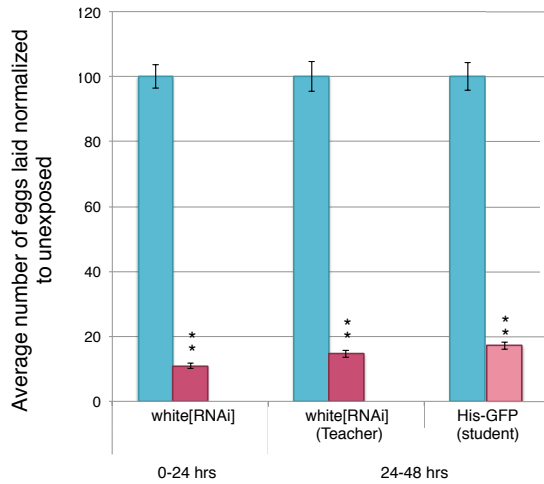

# **D** His-GFP can teach naïve students that are expressing a white<sup>RNAi(30034)</sup> in the MB

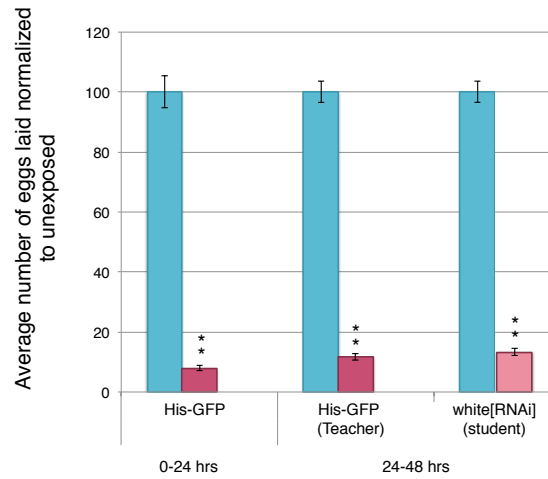

■ Unexposed  
■ Exposed  
■ Naïve
