# Supplementary material for: Social communication of predator-induced changes in Drosophila behavior and germ line physiology
Source: eLife journal article supplement (doi:10.7554/elife.07423), 2015-05-13

**A** MB switch flies with white<sup>RNAi</sup> (30034) fed RU486 can teach naive His-GFP students

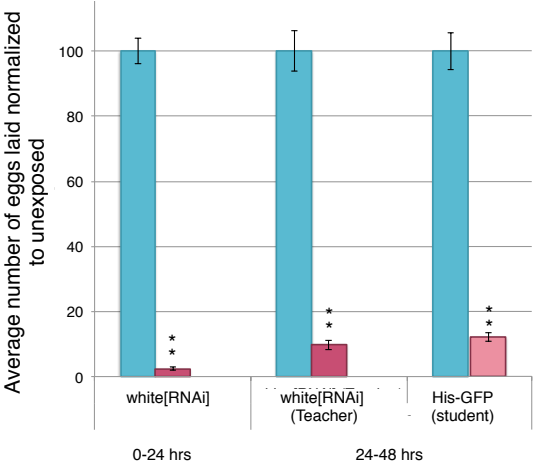

**B** MB switch flies with white<sup>RNAi</sup> (30034) fed RU486 learn from His-GFP teachers

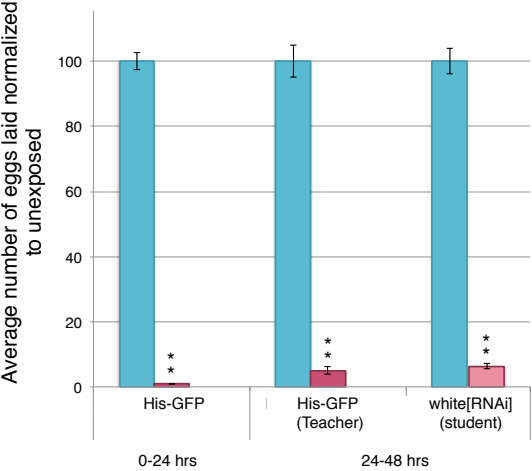

**C** MB switch flies with white<sup>RNAi</sup> (30034) fed methanol can teach naive His-GFP students

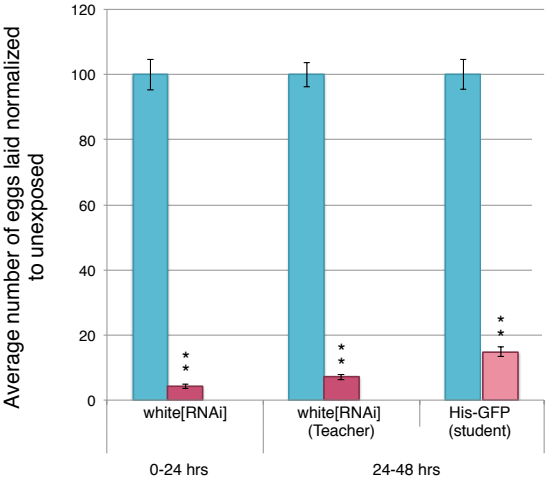

**D** MB switch flies with white<sup>RNAi</sup> (30034) fed methanol learn from His-GFP teachers

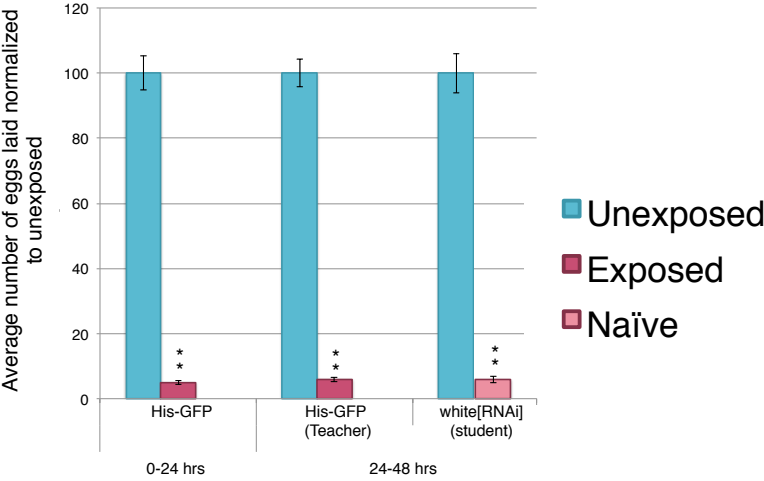

Supplement: supp [file elife-07423-supp-v2.zip]
