# Supplementary material for: Social communication of predator-induced changes in Drosophila behavior and germ line physiology
Source: eLife journal article supplement (doi:10.7554/elife.07423), 2015-05-13

**A** His-GFP cannot respond to wasps in the dark and CS students cannot learn from His-GFP teachers in the dark

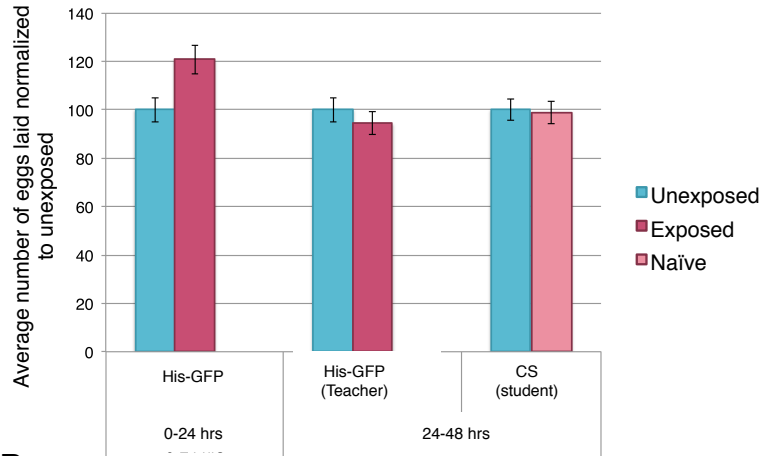

**B** His-GFP cannot respond to wasps in the dark and CS students cannot learn from His-GFP dark exposed in the light

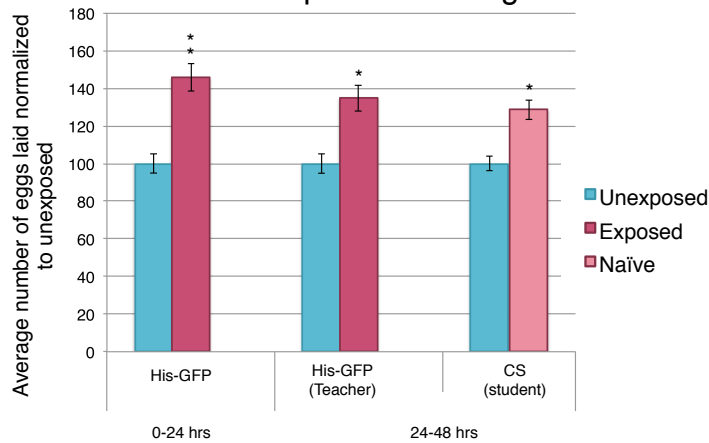

**C** His-GFP respond to wasps in the light but CS students cannot learn from His-GFP teachers in the dark

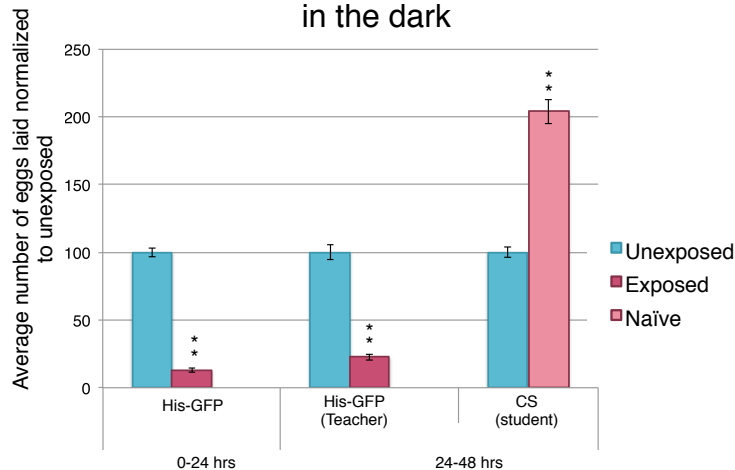

Supplement: supp [file elife-07423-supp-v2.zip]
