# Supplementary material for: Social communication of predator-induced changes in Drosophila behavior and germ line physiology
Source: eLife journal article supplement (doi:10.7554/elife.07423), 2015-05-13
Supplement: supp [file elife-07423-supp-v2.zip]

**A**  $dnc^{ML}$  cannot teach naïve His-GFP students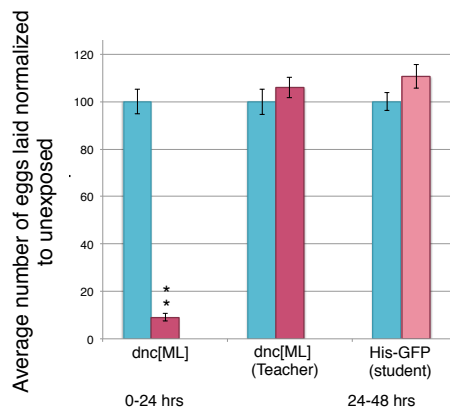**B**  $rut^{2080}$  cannot teach naïve His-GFP students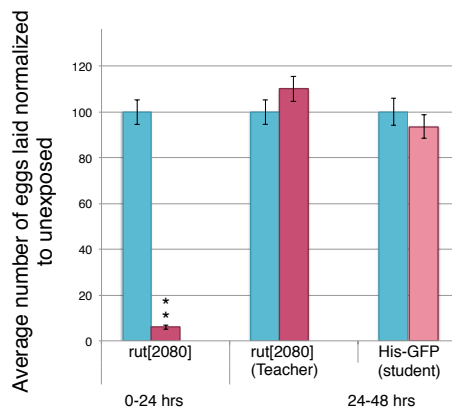**C** His-GFP cannot teach naïve  $dnc^{ML}$  students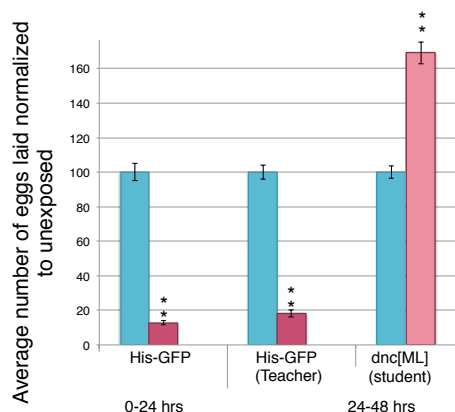**D** His-GFP cannot teach naïve  $rut^{2080}$  students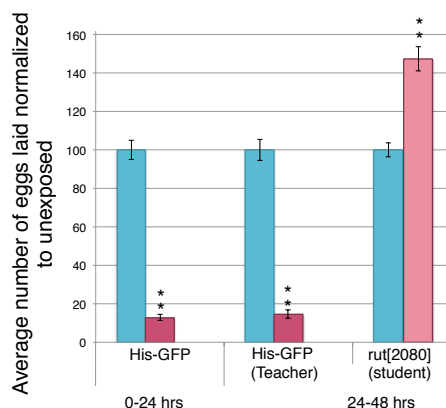**E**  $FMR1^3$  cannot teach naïve His-GFP students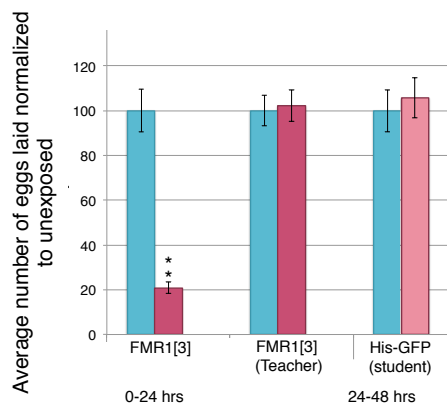**F** His-GFP cannot teach naïve  $FMR1^3$  students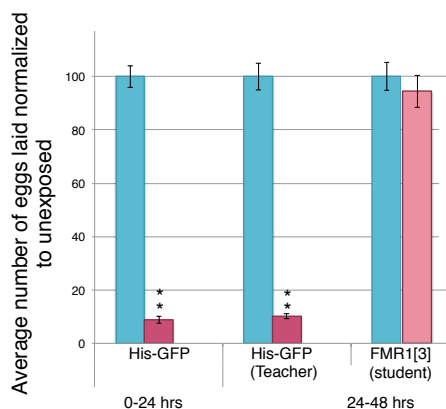**G**  $amn^{X8}$  cannot teach naïve His-GFP students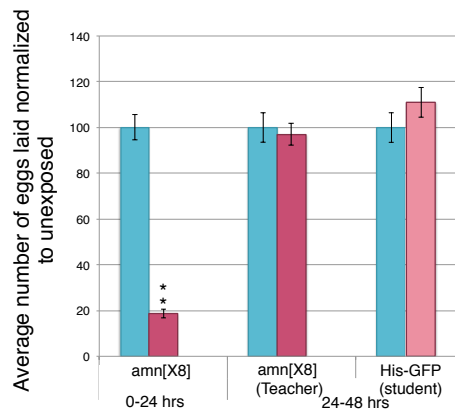**H** His-GFP cannot teach naïve  $amn^{X8}$  students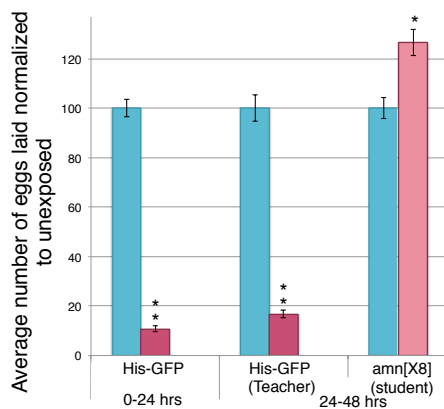

■ Unexposed  
 ■ Exposed  
 ■ Naïve
