# Supplementary material for: Social communication of predator-induced changes in Drosophila behavior and germ line physiology
Source: eLife journal article supplement (doi:10.7554/elife.07423), 2015-05-13
Supplement: supp [file elife_poa_e07423_Supplementary_File_1.xlsx]

## Sheet: Sheet1
Supplementary File 1: Absolute number of apoptotic egg chambers in Canton-S flies immediately following wasp exposure or mock exposure (0-24 hour period in oviposition experiments). Each replicate, replicate sum, and replicate average along with standard error is shown (*P<0.05, **P<0.001).
Replicate 1	Unexposed			Exposed
	Canton S 0-24 hours (Teacher)			Canton S 0-24 hours (Teacher)
Developmental Stage	# of apoptotic egg chambers	total egg chambers	% Apoptotic Events	# of apoptotic egg chambers	total egg chambers	% Apoptotic Events
2--3	0	75	0	1	66	1.515
7--8	3	65	4.615	31	69	44.928
12--13	41	85	48.235	36	69	52.174
Replicate 2	Unexposed			Exposed
	Canton S 0-24 hours (Teacher)			Canton S 0-24 hours (Teacher)
Developmental Stage	# of apoptotic egg chambers	total egg chambers	% Apoptotic Events	# of apoptotic egg chambers	total egg chambers	% Apoptotic Events
2--3	0	104	0	1	98	1.02
7--8	9	101	8.911	32	72	44.445
12--13	38	77	49.351	33	52	63.462
Replicate 3	Unexposed			Exposed
	Canton S 0-24 hours (Teacher)			Canton S 0-24 hours (Teacher)
Developmental Stage	# of apoptotic egg chambers	total egg chambers	% Apoptotic Events	# of apoptotic egg chambers	total egg chambers	% Apoptotic Events
2--3	0	102	0	0	98	0
7--8	7	94	7.447	34	72	47.223
12--13	41	59	69.492	45	58	77.586
All Repilcates Sum	Unexposed			Exposed
	Canton S 0-24 hours (Teacher)			Canton S 0-24 hours (Teacher)
Developmental Stage	# of apoptotic egg chambers	total egg chambers	% Apoptotic Events	# of apoptotic egg chambers	total egg chambers	% Apoptotic Events
2--3	0	261	0	2	262	0.845
7--8	19	260	6.991	97	213	45.531**
12--13	120	221	55.692	114	179	64.407*
All Replicates Average	Unexposed			Exposed
	Canton S 0-24 hours (Teacher)			Canton S 0-24 hours (Teacher)
Developmental Stage	# of apoptotic egg chambers	total egg chambers	% Apoptotic Events	# of apoptotic egg chambers	total egg chambers	% Apoptotic Events
2--3	0 ± 0	93.667 ± 9.351	0 ± 0	0.6667 ± 0.334	87.334 ± 10.667	0.845 ± 0.446
7--8	6.334 ± 1.764	86.667 ± 11.020	6.991 ± 1.261	32.334 ± 0.882	71 ± 1	45.531 ± 0.857
12--13	40 ± 1	73.667 ± 7.6884	55.692 ± 6.907	38 ± 3.606	59.667 ± 4.978	64.407 ± 7.351
