# Supplementary material for: Social communication of predator-induced changes in Drosophila behavior and germ line physiology
Source: eLife journal article supplement (doi:10.7554/elife.07423), 2015-05-13
Supplement: supp [file elife_poa_e07423_Supplementary_File_2.xlsx]

## Sheet: Sheet1
Supplementary File 2: Absolute number of apoptotic egg chambers in GFP-Histone flies immediately following wasp exposure or mock exposure (0-24 hour period in oviposition experiments). Each replicate, replicate sum, and replicate average along with standard error is shown (*P<0.05, **P<0.001).
Replicate 1	Unexposed			Exposed
	His-GFP 0-24 hours (Teacher)			His-GFP 0-24 hours (Teacher)
Developmental Stage	# of apoptotic egg chambers	total egg chambers	% Apoptotic Events	# of apoptotic egg chambers	total egg chambers	% Apoptotic Events
2--3	0	151	0	0	145	0
7--8	4	86	4.651	22	75	29.334
12--13	17	34	50	17	35	41.935
Replicate 2	Unexposed			Exposed
	His-GFP 0-24 hours (Teacher)			His-GFP 0-24 hours (Teacher)
Developmental Stage	# of apoptotic egg chambers	total egg chambers	% Apoptotic Events	# of apoptotic egg chambers	total egg chambers	% Apoptotic Events
2--3	0	173	0	1	155	0.645
7--8	7	107	6.542	28	65	43.077
12--13	20	41	45	15	24	62.5
Replicate 3	Unexposed			Exposed
	His-GFP 0-24 hours (Teacher)			His-GFP 0-24 hours (Teacher)
Developmental Stage	# of apoptotic egg chambers	total egg chambers	% Apoptotic Events	# of apoptotic egg chambers	total egg chambers	% Apoptotic Events
2--3	0	191	0	0	145	0
7--8	5	123	4.065	22	81	27.16
12--13	18	40	45	13	31	41.935
All Repilcates Sum	Unexposed			Exposed
	His-GFP 0-24 hours (Teacher)			His-GFP 0-24 hours (Teacher)
Developmental Stage	# of apoptotic egg chambers	total egg chambers	% Apoptotic Events	# of apoptotic egg chambers	total egg chambers	% Apoptotic Events
2--3	0	515	0	1	469	0.215
7--8	16	316	5.086	72	221	33.190**
12--13	55	115	47.927	45	90	51.002
All Replicates Average	Unexposed			Exposed
	His-GFP 0-24 hours (Teacher)			His-GFP 0-24 hours (Teacher)
Developmental Stage	# of apoptotic egg chambers	total egg chambers	% Apoptotic Events	# of apoptotic egg chambers	total egg chambers	% Apoptotic Events
2--3	0 ± 0	171.667 ± 11.566	0 ± 0	0.334 ± 0.334	156.334 ± 6.960	0.215 ± 0.215
7--8	5.334 ± 0.882	105.334 ± 10.713	5.086 ± 0.747	24 ± 2	73.667 ± 4.667	33.190 ± 4.983
12--13	18.334 ± 0.882	38.334 ± 2.186	47.927 ± 1.505	15 ± 1.155	30 ± 3.215	51.002 ± 6.060
