# Supplementary material for: Social communication of predator-induced changes in Drosophila behavior and germ line physiology
Source: eLife journal article supplement (doi:10.7554/elife.07423), 2015-05-13
Supplement: supp [file elife_poa_e07423_Supplementary_File_3.xlsx]

## Sheet: Sheet1
Supplementary File 3: Absolute number of apoptotic egg chambers in teacher Canton-S flies 24 hours following wasp exposure or mock exposure (24-48 hour period in oviposition experiments). Each replicate, replicate sum, and replicate average along with standard error is shown (*P<0.05, **P<0.001).
Replicate 1	Unexposed			Exposed
	Canton S 24-48 hours (Teacher)			Canton S 24-48 hours (Teacher)
Developmental Stage	# of apoptotic egg chambers	total egg chambers	% Apoptotic Events	# of apoptotic egg chambers	total egg chambers	% Apoptotic Events
2--3	0	118	0	0	124	0
7--8	4	99	4.04	30	64	46.875
12--13	23	42	54.762	23	39	58.974
Replicate 2	Unexposed			Exposed
	Canton S 24-48 hours (Teacher)			Canton S 24-48 hours (Teacher)
Developmental Stage	# of apoptotic egg chambers	total egg chambers	% Apoptotic Events	# of apoptotic egg chambers	total egg chambers	% Apoptotic Events
2--3	0	117	0	1	127	0.787
7--8	2	91	2.198	28	56	50
12--13	27	50	54	22	45	48.889
Replicate 3	Unexposed			Exposed
	Canton S 24-48 hours (Teacher)			Canton S 24-48 hours (Teacher)
Developmental Stage	# of apoptotic egg chambers	total egg chambers	% Apoptotic Events	# of apoptotic egg chambers	total egg chambers	% Apoptotic Events
2--3	0	121	0	1	110	0.091
7--8	2	78	2.564	28	39	66.667
12--13	37	63	58.73	14	19	73.684
All Repilcates Sum	Unexposed			Exposed
	Canton S 24-48 hours (Teacher)			Canton S 24-48 hours (Teacher)
Developmental Stage	# of apoptotic egg chambers	total egg chambers	% Apoptotic Events	# of apoptotic egg chambers	total egg chambers	% Apoptotic Events
2--3	0	356	0	2	361	0.554
7--8	8	268	2.985	84	159	52.830**
12--13	87	155	56.129	59	103	57.281
All Replicates Average	Unexposed			Exposed
	Canton S 24-48 hours (Teacher)			Canton S 24-48 hours (Teacher)
Developmental Stage	# of apoptotic egg chambers	total egg chambers	% Apoptotic Events	# of apoptotic egg chambers	total egg chambers	% Apoptotic Events
2--3	0 ± 0	118.667 ± 1.202	0 ± 0	0.667 ± 0.334	120.334 ± 5.239	0.565 ± 0.285
7--8	2.667 ± 0.667	89.334 ± 6.119	2.934 ± 0.563	28 ± 1.155	53 ± 7.371	54.514 ± 6.143
12--13	29 ± 4.163	61.667 ± 6.119	55.831 ± 1.466	19.667 ± 2.848	34.334 ± 7.860	60.516 ± 7.199
