# Supplementary material for: Social communication of predator-induced changes in Drosophila behavior and germ line physiology
Source: eLife journal article supplement (doi:10.7554/elife.07423), 2015-05-13
Supplement: supp [file elife_poa_e07423_Supplementary_File_4.xlsx]

## Sheet: Sheet1
Supplementary File 4: Absolute number of apoptotic egg chambers in teacher GFP- Histone flies 24 hours following wasp exposure or mock exposure (24-48 hour period in oviposition experiments). Each replicate, replicate sum, and replicate average along with standard error is shown (*P<0.05, **P<0.001).
Replicate 1	Unexposed			Exposed
	His-GFP 24-48 hours (Teacher)			His-GFP 24-48 hours (Teacher)
Developmental Stage	# of apoptotic egg chambers	total egg chambers	% Apoptotic Events	# of apoptotic egg chambers	total egg chambers	% Apoptotic Events
2--3	0	242	0	0	198	0
7--8	5	146	3.424	32	119	26.891
12--13	23	45	51.112	18	34	52.941
Replicate 2	Unexposed			Exposed
	His-GFP 24-48 hours (Teacher)			His-GFP 24-48 hours (Teacher)
Developmental Stage	# of apoptotic egg chambers	total egg chambers	% Apoptotic Events	# of apoptotic egg chambers	total egg chambers	% Apoptotic Events
2--3	0	223	0	3	172	1.744
7--8	4	156	2.564	27	100	27
12--13	20	41	48.78	19	35	54.286
Replicate 3	Unexposed			Exposed
	His-GFP 24-48 hours (Teacher)			His-GFP 24-48 hours (Teacher)
Developmental Stage	# of apoptotic egg chambers	total egg chambers	% Apoptotic Events	# of apoptotic egg chambers	total egg chambers	% Apoptotic Events
2--3	0	178	0	3	168	1.786
7--8	8	129	6.202	26	81	32.099
12--13	14	21	66.667	14	23	60.87
All Repilcates Sum	Unexposed			Exposed
	His-GFP 24-48 hours (Teacher)			His-GFP 24-48 hours (Teacher)
Developmental Stage	# of apoptotic egg chambers	total egg chambers	% Apoptotic Events	# of apoptotic egg chambers	total egg chambers	% Apoptotic Events
2--3	0	643	0	6	538	1.115*
7--8	17	431	3.944	85	300	28.334**
12--13	57	107	53.271	51	92	55.435
All Replicates Average	Unexposed			Exposed
	His-GFP 24-48 hours (Teacher)			His-GFP 24-48 hours (Teacher)
Developmental Stage	# of apoptotic egg chambers	total egg chambers	% Apoptotic Events	# of apoptotic egg chambers	total egg chambers	% Apoptotic Events
2--3	0 ± 0	214.334 ± 18.977	0 ± 0	2 ± 1	179.334 ± 9.404	1.177 ± 0.588
7--8	5.667 ± 1.202	143.667 ± 7.881	4.063 ± 1.098	28.334 ± 1.856	100 ± 10.970	28.663 ± 1.718
12--13	19 ± 2.646	35.667 ± 7.424	55.519 ± 5.614	17 ± 30.667	30.667 ± 3.844	56.032 ± 2.450
