# Supplementary material for: Social communication of predator-induced changes in Drosophila behavior and germ line physiology
Source: eLife journal article supplement (doi:10.7554/elife.07423), 2015-05-13
Supplement: supp [file elife_poa_e07423_Supplementary_File_5.xlsx]

## Sheet: Sheet1
Supplementary File 5: Absolute number of apoptotic egg chambers in Canton-S flies fed yeast paste immediately following wasp exposure or mock exposure (0-24 hour period in oviposition experiments). Each replicate, replicate sum, and replicate average along with standard error is shown (*P<0.05, **P<0.001).
Replicate 1	Unexposed			Exposed
	Canton S with yeast paste 0-24 hours			Canton S with yeast paste 0-24 hours
Developmental Stage	# of apoptotic egg chambers	total egg chambers	% Apoptotic Events	# of apoptotic egg chambers	total egg chambers	% Apoptotic Events
2--3	0	162	0.617	0	145	0
7--8	1	104	0.962	27	78	34.615
12--13	23	50	46	24	54	44.444
Replicate 2	Unexposed			Exposed
	Canton S with yeast paste 0-24 hours			Canton S with yeast paste 0-24 hours
Developmental Stage	# of apoptotic egg chambers	total egg chambers	% Apoptotic Events	# of apoptotic egg chambers	total egg chambers	% Apoptotic Events
2--3	0	171	0	0	154	0
7--8	1	103	0.971	28	68	41.176
12--13	22	62	35.484	20	45	44.444
Replicate 3	Unexposed			Exposed
	Canton S with yeast paste 0-24 hours			Canton S with yeast paste 0-24 hours
Developmental Stage	# of apoptotic egg chambers	total egg chambers	% Apoptotic Events	# of apoptotic egg chambers	total egg chambers	% Apoptotic Events
2--3	0	172	0	0	156	0
7--8	0	105	0	20	65	30.77
12--13	28	65	43.077	10	29	34.483
All Repilcates Sum	Unexposed			Exposed
	Canton S with yeast paste 0-24 hours			Canton S with yeast paste 0-24 hours
Developmental Stage	# of apoptotic egg chambers	total egg chambers	% Apoptotic Events	# of apoptotic egg chambers	total egg chambers	% Apoptotic Events
2--3	1	505	0.206	0	455	0
7--8	2	312	0.644	75	211	35.52
12--13	73	177	41.52	54	128	41.124
All Replicates Average	Unexposed			Exposed
	Canton S with yeast paste 0-24 hours			Canton S with yeast paste 0-24 hours
Developmental Stage	# of apoptotic egg chambers	total egg chambers	% Apoptotic Events	# of apoptotic egg chambers	total egg chambers	% Apoptotic Events
2--3	0.333 ± 0.333	168.334 ± 3.180	0.206 ± 0.206	0 ± 0	151.667 ± 3.383	0 ± 0
7--8	0.667 ± 0.333	104 ± 0.577	0.644 ± 0.322	25 ± 2.517	70.334 ± 3.930	35.520 ± 3.038
12--13	24.334 ± 1.856	59 ± 4.583	41.520 ± 3.134	18 ± 4.163	42.667 ± 7.311	41.124 ± 3.321
