# Supplementary material for: Social communication of predator-induced changes in Drosophila behavior and germ line physiology
Source: eLife journal article supplement (doi:10.7554/elife.07423), 2015-05-13
Supplement: supp [file elife_poa_e07423_Supplementary_File_6.xlsx]

## Sheet: Sheet1
Supplementary File 6: Absolute number of apoptotic egg chambers in student GFP- Histone flies 24 hours following wasp exposure or mock exposure (24-48 hour period in oviposition experiments). Each replicate, replicate sum, and replicate average along with standard error is shown (*P<0.05, **P<0.001).
Replicate 1	Unexposed			Exposed
	His-GFP as students (24-48 hours)			His-GFP as students (24-48 hours)
Developmental Stage	# of apoptotic egg chambers	total egg chambers	% Apoptotic Events	# of apoptotic egg chambers	total egg chambers	% Apoptotic Events
2--3	0	115	0	0	123	0
7--8	3	104	2.884	29	87	33.334
12--13	33	58	56.897	23	47	48.936
Replicate 2	Unexposed			Exposed
	His-GFP as students (24-48 hours)			His-GFP as students (24-48 hours)
Developmental Stage	# of apoptotic egg chambers	total egg chambers	% Apoptotic Events	# of apoptotic egg chambers	total egg chambers	% Apoptotic Events
2--3	0	124	0	0	133	0
7--8	4	96	4.167	30	75	40
12--13	48	65	73.846	30	54	55.556
Replicate 3	Unexposed			Exposed
	His-GFP as students (24-48 hours)			His-GFP as students (24-48 hours)
Developmental Stage	# of apoptotic egg chambers	total egg chambers	% Apoptotic Events	# of apoptotic egg chambers	total egg chambers	% Apoptotic Events
2--3	0	123	0	0	109	0
7--8	3	89	3.371	23	47	48.936
12--13	38	65	58.462	24	39	61.538
All Repilcates Sum	Unexposed			Exposed
	His-GFP as students (24-48 hours)			His-GFP as students (24-48 hours)
Developmental Stage	# of apoptotic egg chambers	total egg chambers	% Apoptotic Events	# of apoptotic egg chambers	total egg chambers	% Apoptotic Events
2--3	0	362	0	0	365	0
7--8	10	289	3.46	82	209	39.234**
12--13	119	188	63.298	77	140	55
All Replicates Average	Unexposed			Exposed
	His-GFP as students (24-48 hours)			His-GFP as students (24-48 hours)
Developmental Stage	# of apoptotic egg chambers	total egg chambers	% Apoptotic Events	# of apoptotic egg chambers	total egg chambers	% Apoptotic Events
2--3	0± 0	120.667±2.848	0± 0	0± 0	121.667±6.960	0± 0
7--8	3.334 ± 0.334	96.334 ± 4.334	3.474 ± 0.374	27.334 ± 2.186	69.667 ± 411.851	40.756 ± 4.520
12--13	39.667 ± 4.163	39.667 ± 2.334	63.068 ± 5.408	25.667 ± 2.186	46.667 ± 4.334	55.343 ± 3.640
