# Supplementary material for: Social communication of predator-induced changes in Drosophila behavior and germ line physiology
Source: eLife journal article supplement (doi:10.7554/elife.07423), 2015-05-13
Supplement: supp [file elife_poa_e07423_Supplementary_File_7.xlsx]

## Sheet: Sheet1
Supplementary File 7: Absolute number of apoptotic egg chambers in student Canton-S flies 24 hours following wasp exposure or mock exposure (24-48 hour period in oviposition experiments). Each replicate, replicate sum, and replicate average along with standard error is shown (*P<0.05, **P<0.001).
Replicate 1	Unexposed			Exposed
	Canton S as students (24-48 hours)			Canton S as students (24-48 hours)
Developmental Stage	# of apoptotic egg chambers	total egg chambers	% Apoptotic Events	# of apoptotic egg chambers	total egg chambers	% Apoptotic Events
2--3	0	198	0	0	204	0
7--8	5	144	3.473	22	131	16.794
12--13	17	32	53.125	17	38	44.737
Replicate 2	Unexposed			Exposed
	Canton S as students (24-48 hours)			Canton S as students (24-48 hours)
Developmental Stage	# of apoptotic egg chambers	total egg chambers	% Apoptotic Events	# of apoptotic egg chambers	total egg chambers	% Apoptotic Events
2--3	0	181	0	0	166	0
7--8	4	147	2.721	22	80	27.5
12--13	15	31	48.287	22	41	53.659
Replicate 3	Unexposed			Exposed
	Canton S as students (24-48 hours)			Canton S as students (24-48 hours)
Developmental Stage	# of apoptotic egg chambers	total egg chambers	% Apoptotic Events	# of apoptotic egg chambers	total egg chambers	% Apoptotic Events
2--3	0	169	0	2	166	1.205
7--8	6	100	6	18	67	26.866
12--13	17	32	53.125	13	26	50
All Repilcates Sum	Unexposed			Exposed
	Canton S as students (24-48 hours)			Canton S as students (24-48 hours)
Developmental Stage	# of apoptotic egg chambers	total egg chambers	% Apoptotic Events	# of apoptotic egg chambers	total egg chambers	% Apoptotic Events
2--3	0	548	0	0	536	0
7--8	15	391	3.836	62	278	22.302**
12--13	49	95	51.579	52	105	49.524
All Replicates Average	Unexposed			Exposed
	Canton S as students (24-48 hours)			Canton S as students (24-48 hours)
Developmental Stage	# of apoptotic egg chambers	total egg chambers	% Apoptotic Events	# of apoptotic egg chambers	total egg chambers	% Apoptotic Events
2--3	0± 0	182.667±8.413	0± 0	0± 0	178.667±12.667	0± 0
7--8	5 ± 0.577	130.334 ± 15.191	4.064 ± 0.992	20.667 ± 1.334	92.667 ± 19.531	23.720 ± 3.468
12--13	16.334 ± 0.667	31.667 ± 0.334	51.546 ± 1.579	17.334 ± 2.603	35 ± 4.583	49.651 ± 2.589
