# Supplementary material for: Social communication of predator-induced changes in Drosophila behavior and germ line physiology
Source: eLife journal article supplement (doi:10.7554/elife.07423), 2015-05-13
Supplement: supp [file elife_poa_e07423_Supplementary_File_8.xlsx]

## Sheet: Sheet1
Supplementary File 8: Absolute number of apoptotic egg chambers in Dcp-1[RNAi] flies immediately following wasp exposure or mock exposure (0-24 hour period in oviposition experiments). Each replicate, replicate sum, and replicate average along with standard error is shown (*P<0.05, **P<0.001).
Replicate 1	Unexposed			Exposed
	Dcp-1 [RNAi] (0-24 hours)			Dcp-1 [RNAi] (0-24 hours)
Developmental Stage	# of apoptotic egg chambers	total egg chambers	% Apoptotic Events	# of apoptotic egg chambers	total egg chambers	% Apoptotic Events
2--3	0	202	0	0	199	0
7--8	3	124	2.419	5	147	3.401
12--13	24	61	39.344	36	75	48
Replicate 2	Unexposed			Exposed
	Dcp-1 [RNAi] (0-24 hours)			Dcp-1 [RNAi] (0-24 hours)
Developmental Stage	# of apoptotic egg chambers	total egg chambers	% Apoptotic Events	# of apoptotic egg chambers	total egg chambers	% Apoptotic Events
2--3	0	205	0	0	182	0
7--8	2	126	1.587	1	115	0.87
12--13	18	50	55.882	17	36	47.223
Replicate 3	Unexposed			Exposed
	Dcp-1 [RNAi] (0-24 hours)			Dcp-1 [RNAi] (0-24 hours)
Developmental Stage	# of apoptotic egg chambers	total egg chambers	% Apoptotic Events	# of apoptotic egg chambers	total egg chambers	% Apoptotic Events
2--3	0	182	0	0	199	0
7--8	4	134	2.985	2	127	1.575
12--13	19	34	55.882	29	55	52.727
All Repilcates Sum	Unexposed			Exposed
	Dcp-1 [RNAi] (0-24 hours)			Dcp-1 [RNAi] (0-24 hours)
Developmental Stage	# of apoptotic egg chambers	total egg chambers	% Apoptotic Events	# of apoptotic egg chambers	total egg chambers	% Apoptotic Events
2--3	0	589	0	0	580	0
7--8	9	384	2.331	8	389	1.95
12--13	61	145	43.742	52	166	49.316
All Replicates Average	Unexposed			Exposed
	Dcp-1 [RNAi] (0-24 hours)			Dcp-1 [RNAi] (0-24 hours)
Developmental Stage	# of apoptotic egg chambers	total egg chambers	% Apoptotic Events	# of apoptotic egg chambers	total egg chambers	% Apoptotic Events
2--3	0±0	196.334±7.219	0±0	0±0	193.334±5.667	0±0
7--8	3 ± 0.577	128 ± 3.055	2.331 ± 0.406	2.667 ± 1.202	129.667 ± 9.334	1.949 ± 0.754
12--13	20.334 ± 1.856	48.334 ± 7.839	43.742 ± 6.146	27.334 ± 5.548	55.334 ± 11.26	49.316 ± 1.720
