# Supplementary material for: Social communication of predator-induced changes in Drosophila behavior and germ line physiology
Source: eLife journal article supplement (doi:10.7554/elife.07423), 2015-05-13
Supplement: supp [file elife_poa_e07423_Supplementary_File_9.xlsx]

## Sheet: Sheet1
Supplementary File 9: Absolute number of apoptotic egg chambers in teacher Dcp- 1[RNAi] flies 24 hours following wasp exposure or mock exposure (24-48 hour period in oviposition experiments). Each replicate, replicate sum, and replicate average along with standard error is shown (*P<0.05, **P<0.001).
Replicate 1	Unexposed			Exposed
	Dcp-1 [RNAi] (24-48 hours)			Dcp-1 [RNAi] (24-48 hours)
Developmental Stage	# of apoptotic egg chambers	total egg chambers	% Apoptotic Events	# of apoptotic egg chambers	total egg chambers	% Apoptotic Events
2--3	0	187	0	0	217	0
7--8	2	115	1.739	1	139	0.719
12--13	28	53	52.83	23	44	52.272
Replicate 2	Unexposed			Exposed
	Dcp-1 [RNAi] (24-48 hours)			Dcp-1 [RNAi] (24-48 hours)
Developmental Stage	# of apoptotic egg chambers	total egg chambers	% Apoptotic Events	# of apoptotic egg chambers	total egg chambers	% Apoptotic Events
2--3	0	177	0	0	236	0
7--8	1	123	0.813	1	123	0.813
12--13	23	40	57.5	21	40	52.5
Replicate 3	Unexposed			Exposed
	Dcp-1 [RNAi] (24-48 hours)			Dcp-1 [RNAi] (24-48 hours)
Developmental Stage	# of apoptotic egg chambers	total egg chambers	% Apoptotic Events	# of apoptotic egg chambers	total egg chambers	% Apoptotic Events
2--3	0	224	0	0	201	0
7--8	2	125	1.6	1	113	0.885
12--13	24	48	50	25	44	56.818
All Repilcates Sum	Unexposed			Exposed
	Dcp-1 [RNAi] (24-48 hours)			Dcp-1 [RNAi] (24-48 hours)
Developmental Stage	# of apoptotic egg chambers	total egg chambers	% Apoptotic Events	# of apoptotic egg chambers	total egg chambers	% Apoptotic Events
2--3	0	588	0	0	654	0
7--8	5	363	1.377	3	375	0.8
12--13	75	141	53.191	69	128	53.906
All Replicates Average	Unexposed			Exposed
	Dcp-1 [RNAi] (24-48 hours)			Dcp-1 [RNAi] (24-48 hours)
Developmental Stage	# of apoptotic egg chambers	total egg chambers	% Apoptotic Events	# of apoptotic egg chambers	total egg chambers	% Apoptotic Events
2--3	0± 0	196±14.295	0± 0	0± 0	218±10.116	0± 0
7--8	1.667 ± 0.334	121 ± 3.055	1.384 ± 0.288	1 ± 0	125 ± 7.572	0.806 ± 0.048
12--13	25 ± 1.528	47 ± 3.786	53.443 ± 2.187	23 ± 1.155	42.667 ± 1.334	53.864 ± 1.479
