# Supplementary material for: Social communication of predator-induced changes in Drosophila behavior and germ line physiology
Source: eLife journal article supplement (doi:10.7554/elife.07423), 2015-05-13
Supplement: supp [file elife_poa_e07423_Supplementary_File_10.xlsx]

## Sheet: Sheet1
Supplementary File 10: Absolute number of apoptotic egg chambers in student GFP-Histone flies, paired with Dcp-1[RNAi] teachers, 24 hours following wasp exposure or mock exposure (24-48 hour period in oviposition experiments). Each replicate, replicate sum, and replicate average along with standard error is shown (*P<0.05, **P<0.001).
Replicate 1	Unexposed			Exposed
	His-GFP students (Dcp-1[RNAi] Teachers) (24-48 hours)			His-GFP students (Dcp-1[RNAi] Teachers) (24-48 hours)
Developmental Stage	# of apoptotic egg chambers	total egg chambers	% Apoptotic Events	# of apoptotic egg chambers	total egg chambers	% Apoptotic Events
2--3	0	200	0	0	215	0
7--8	0	126	0	29	105	27.619
12--13	34	64	53.125	21	39	53.846
Replicate 2	Unexposed			Exposed
	His-GFP students (Dcp-1[RNAi] Teachers) (24-48 hours)			His-GFP students (Dcp-1[RNAi] Teachers) (24-48 hours)
Developmental Stage	# of apoptotic egg chambers	total egg chambers	% Apoptotic Events	# of apoptotic egg chambers	total egg chambers	% Apoptotic Events
2--3	0	182	0	0	208	0
7--8	1	111	0.901	24	78	30.769
12--13	22	35	62.857	16	32	50
Replicate 3	Unexposed			Exposed
	His-GFP students (Dcp-1[RNAi] Teachers) (24-48 hours)			His-GFP students (Dcp-1[RNAi] Teachers) (24-48 hours)
Developmental Stage	# of apoptotic egg chambers	total egg chambers	% Apoptotic Events	# of apoptotic egg chambers	total egg chambers	% Apoptotic Events
2--3	0	203	0	0	211	0
7--8	2	121	1.653	25	95	26.316
12--13	19	34	55.882	18	36	50
All Repilcates Sum	Unexposed			Exposed
	His-GFP students (Dcp-1[RNAi] Teachers) (24-48 hours)			His-GFP students (Dcp-1[RNAi] Teachers) (24-48 hours)
Developmental Stage	# of apoptotic egg chambers	total egg chambers	% Apoptotic Events	# of apoptotic egg chambers	total egg chambers	% Apoptotic Events
2--3	0	588	0	0	634	0
7--8	3	358	0.838	78	278	28.058
12--13	75	133	56.391	55	107	51.402
All Replicates Average	Unexposed			Exposed
	His-GFP students (Dcp-1[RNAi] Teachers) (24-48 hours)			His-GFP students (Dcp-1[RNAi] Teachers) (24-48 hours)
Developmental Stage	# of apoptotic egg chambers	total egg chambers	% Apoptotic Events	# of apoptotic egg chambers	total egg chambers	% Apoptotic Events
2--3	0± 0	195±6.557	0± 0	0± 0	211.334±2.028	0± 0
7--8	1 ± 0.577	119.334 ± 4.410	0.851 ± 0.4778	26 ± 1.528	92.667 ± 7.881	28.235 ± 1.322
12--13	25 ± 4.583	44.334 ± 9.838	57.288 ± 2.896	18.334 ± 1.453	35.667 ± 2.028	51.282 ± 1.282
