# Supplementary material for: Social communication of predator-induced changes in Drosophila behavior and germ line physiology
Source: eLife journal article supplement (doi:10.7554/elife.07423), 2015-05-13
Supplement: supp [file elife_poa_e07423_Supplementary_File_11.xlsx]

## Sheet: Sheet1
Supplementary File 11: Absolute number of apoptotic egg chambers in Orb2ΔQ flies immediately following wasp exposure or mock exposure (0-24 hour period in oviposition experiments). Each replicate, replicate sum, and replicate average along with standard error is shown (*P<0.05, **P<0.001).
Replicate 1	Unexposed			Exposed
	Orb2ΔQ (0-24 hours)			Orb2ΔQ (0-24 hours)
Developmental Stage	# of apoptotic egg chambers	total egg chambers	% Apoptotic Events	# of apoptotic egg chambers	total egg chambers	% Apoptotic Events
2--3	0	157	0	2	132	1.515
7--8	9	116	7.759	33	89	37.079
12--13	19	41	46.341	13	33	39.394
Replicate 2	Unexposed			Exposed
	Orb2ΔQ (0-24 hours)			Orb2ΔQ (0-24 hours)
Developmental Stage	# of apoptotic egg chambers	total egg chambers	% Apoptotic Events	# of apoptotic egg chambers	total egg chambers	% Apoptotic Events
2--3	0	157	0	0	172	0
7--8	7	129	5.426	30	89	33.709
12--13	17	33	51.515	18	31	58.065
Replicate 3	Unexposed			Exposed
	Orb2ΔQ (0-24 hours)			Orb2ΔQ (0-24 hours)
Developmental Stage	# of apoptotic egg chambers	total egg chambers	% Apoptotic Events	# of apoptotic egg chambers	total egg chambers	% Apoptotic Events
2--3	0	170	0	0	160	0
7--8	4	110	3.636	30	72	41.667
12--13	17	36	47.222	15	33	45.455
All Repilcates Sum	Unexposed			Exposed
	Orb2ΔQ (0-24 hours)			Orb2ΔQ (0-24 hours)
Developmental Stage	# of apoptotic egg chambers	total egg chambers	% Apoptotic Events	# of apoptotic egg chambers	total egg chambers	% Apoptotic Events
2--3	0	480	0	2	464	0.505
7--8	20	355	5.607	93	250	37.484**
12--13	53	110	48.36	46	97	47.638
All Replicates Average	Unexposed			Exposed
	Orb2ΔQ (0-24 hours)			Orb2ΔQ (0-24 hours)
Developmental Stage	# of apoptotic egg chambers	total egg chambers	% Apoptotic Events	# of apoptotic egg chambers	total egg chambers	% Apoptotic Events
2--3	0±0	160±5.131	0±0	0.6667 ± 0.667	154.667 ± 11.851	0.505 ± 0.505
7--8	6.667 ± 1.453	118.334 ± 5.608	5.607 ± 1.193	31 ± 1	83.334 ± 5.667	37.484 ± 2.306
12--13	17.667 ± 0.667	36.667 ± 2.334	48.360 ± 1.598	15.334 ± 1.453	32.334 ± 0.667	47.638 ± 5.499
