# Supplementary material for: Social communication of predator-induced changes in Drosophila behavior and germ line physiology
Source: eLife journal article supplement (doi:10.7554/elife.07423), 2015-05-13
Supplement: supp [file elife_poa_e07423_Supplementary_File_12.xlsx]

## Sheet: Sheet1
Supplementary File 12: Absolute number of apoptotic egg chambers in Orb2ΔQ flies 24 hours following wasp exposure or mock exposure (24-48 hour period in oviposition experiments). Each replicate, replicate sum, and replicate average along with standard error is shown (*P<0.05, **P<0.001).
Replicate 1	Unexposed			Exposed
	Orb2ΔQ (24-48 hours)			Orb2ΔQ (24-48 hours)
Developmental Stage	# of apoptotic egg chambers	total egg chambers	% Apoptotic Events	# of apoptotic egg chambers	total egg chambers	% Apoptotic Events
2--3	2	187	1.07	1	204	0.49
7--8	6	92	6.522	9	108	8.334
12--13	14	29	48.276	12	24	50
Replicate 2	Unexposed			Exposed
	Orb2ΔQ (24-48 hours)			Orb2ΔQ (24-48 hours)
Developmental Stage	# of apoptotic egg chambers	total egg chambers	% Apoptotic Events	# of apoptotic egg chambers	total egg chambers	% Apoptotic Events
2--3	0	167	0	0	195	0
7--8	10	102	9.804	11	103	10.68
12--13	17	31	54.839	17	30	56.667
Replicate 3	Unexposed			Exposed
	Orb2ΔQ (24-48 hours)			Orb2ΔQ (24-48 hours)
Developmental Stage	# of apoptotic egg chambers	total egg chambers	% Apoptotic Events	# of apoptotic egg chambers	total egg chambers	% Apoptotic Events
2--3	0	207	0	1	172	0.581
7--8	12	93	12.903	10	92	10.87
12--13	14	28	50	9	15	60
All Repilcates Sum	Unexposed			Exposed
	Orb2ΔQ (24-48 hours)			Orb2ΔQ (24-48 hours)
Developmental Stage	# of apoptotic egg chambers	total egg chambers	% Apoptotic Events	# of apoptotic egg chambers	total egg chambers	% Apoptotic Events
2--3	2	561	0.357	2	571	0.357
7--8	28	267	9.743	30	303	9.961
12--13	45	88	51.038	38	69	55.556
All Replicates Average	Unexposed			Exposed
	Orb2ΔQ (24-48 hours)			Orb2ΔQ (24-48 hours)
Developmental Stage	# of apoptotic egg chambers	total egg chambers	% Apoptotic Events	# of apoptotic egg chambers	total egg chambers	% Apoptotic Events
2--3	0.667 ± 0.667	187 ± 11.547	0.357 ± 0.357	0.6667 ± 0.334	190.334 ± 9.528	0.357 ± 0.181
7--8	9.334 ± 1.764	95.667 ± 3.180	9.743 ± 1.842	10 ± 0.577	101 ± 4.726	9.961 ± 0.816
12--13	15 ± 1	29.334 ± 0.882	51.038 ± 1.964	12.667 ± 2.334	23 ± 4.359	55.556 ± 2.940
