# Supplementary material for: Social communication of predator-induced changes in Drosophila behavior and germ line physiology
Source: eLife journal article supplement (doi:10.7554/elife.07423), 2015-05-13
Supplement: supp [file elife_poa_e07423_Supplementary_File_13.xlsx]

## Sheet: Sheet1
Supplementary File 13: Genotypes of each fly strain used in study. Names used in study, followed by full genotype and location acquired from shown.
Gene/Allele Name	Genotype	Acquisition Location	ID #
Orco1	w[*]; w[+*] Orco[1]	Bloomington Stock Center	23129
ninaBP315	w[*]/Dp(1;Y)y[+]; ninaB[1], P{w[+mC]=UAS-ninaB.G}3	Bloomington Stock Center	24776
UAS-Dcp-1RNAi	y[1] v[1]; P{y[+t7.7] v[+t1.8]=TRiP.HM05120}attP2	Bloomington Stock Center	28909
UAS-driceRNAi	y[1] sc[*] v[1]; P{y[+t7.7] v[+t1.8]=TRiP.HMS00398}attP2	Bloomington Stock Center	32403
Matα GAL4	w[*]; P{w[+mC]=matalpha4-GAL-VP16}V37	Bloomington Stock Center	7063
dnc1	dnc[1]	Griffith Lab	N/A
rut1	rut[1]	Griffith Lab	N/A
Orb2ΔQ	Orb2[ΔQ]	Keleman et al., 2007	N/A
Adf1nal	Adf1[nal]	DeZazzo et al., 2000	N/A
GFP-Histone	w[*]; P{w[+mC]=His2Av[T:Avic\GFP-S65T]}62A/T(2;3)TSTL, CyO: TM6B, Tb[1]	Clarkson and Saint, 1999	N/A
wg1	wg[1]cn[1]	Ahmed Lab	2978
UAS-TeTx	wg1 w[*]; P{w[+mC]=UAS-TeTxLC.tnt}G2	Bloomington Stock Center	28838
OK-107	w[*]; P{w[+mW.hs]=GawB}ey[OK107]/In(4)ci[D], ci[D] pan[ciD] sv[spa-pol]	Bloomington Stock Center	854
UAS-Rpr	UASrpr/TM3	Ahmed Lab	N/A
MS1096 GAL4		Ahmed Lab	N/A
Dcp-12	yw/y+; Ys dcp-1[2]	McCall Lab	N/A
Dcp-13	yw; dcp-1[3]	McCall Lab	N/A
amn1	amn[1]	Griffith Lab	5954
dncML	y[1] w[1] dnc[ML] f[36a]/FM7a	Griffith Lab	9407
rut2080	P{ry[+t7.2]=lArB}rut[2080]; P{w[+mC]=UAS-rut.Z}2	Griffith Lab	9405
amnX8	amn[X8]	Griffith Lab	N/A
FMR13	Fmr1[3]	-	N/A
FMR1B55	w[*]; Fmr1[B55]	Bloomington Stock Center	109026
UAS-Orb2RNAi	y[1] v[1]; P{y[+t7.7] v[+t1.8]=TRiP.JF02376}attP2	Bloomington Stock Center	27050
MB Gene-Switch	P{MB-Switch}	Greg Roman	N/A
white	w[1118]; P{y[+t7.7] w[+mC]=UAS-QS.P}attP2	Bloomington Stock Center	30033
white	y[1] w[1118]; Pin[1]/CyO; P{ry[+t7.2]=neoFRT}82B P{w[+mC]=tub-QS.P}9B	Bloomington Stock Center	30034
GFP.nls	w[1118]; P{w[+mc]=UAS-GFP.nls}8	Bloomington Stock Center	4776
