# Supplementary material for: Social communication of predator-induced changes in Drosophila behavior and germ line physiology
Source: eLife journal article supplement (doi:10.7554/elife.07423), 2015-05-13
Supplement: supp [file elife_poa_e07423_Supplementary_File_14.xlsx]

## Sheet: Sheet1
Supplementary File 14: Statistical analyses and corresponding P-values shown for main figures. Comparison groups, statistical test performed, sample size, and P-values are shown for a corresponding figure
Corresponding figure	Comparison groups	Sample size	p-value	Statistical test
1B	w1118 exposed vs unexposed	24	3.897e-15	t-test
1B	OR exposed vs unexposed	24	8.338e-16	t-test
1B	CS exposed vs unexposed	24	6.905e-16	t-test
1B	His-GFP exposed vs unexposed	24	4.688e-11	t-test
1C	CS (0-24) exposed vs unexposed	24	7.35e-12	t-test
1C	CS (24-48) exposed vs unexposed	24	1.575e-06	t-test
1C	His-GFP (24-48) naïve vs unexposed	24	8.987e-12	t-test
2B	CS (0-24) exposed vs unexposed	24	2.032e-15	t-test
2B	CS (24-48) exposed vs unexposed	24	9.199e-13	t-test
2B	His-GFP (24-48) naïve vs unexposed	24	9.956e-12	t-test
2B	His-GFP (48-72) naïve vs unexposed	24	2.428e-05	t-test
2B	CS (48-72) naïve vs unexposed	24	0.006028	t-test
3B	CS (0-24) exposed vs unexposed	24	4.12066e-26	t-test
3B	CS (24-48) exposed vs unexposed	24	9.54308e-22	t-test
3B	His-GFP (24-48) naïve vs unexposed	24	7.91205e-17	t-test
3B	CS (48-72) naïve vs unexposed	24	9.44177e-16	t-test
3B	His-GFP (48-72) naïve vs unexposed	24	2.95889e-14	t-test
3C	His-GFP (0-24) exposed vs unexposed	24	4.85725e-16	t-test
3C	His-GFP (24-48) exposed vs unexposed	24	5.72472e-18	t-test
3C	CS (24-48) naïve vs unexposed	24	2.30264e-20	t-test
3C	His-GFP (48-72) naïve vs unexposed	24	4.03196e-22	t-test
3C	CS (48-72) naïve vs unexposed	24	3.0925e-29	t-test
4A	CS (0-24) exposed vs unexposed	3	4.132e-05	t-test
4A	CS (24-48) exposed vs unexposed	3	0.01331	t-test
4A	His-GFP (24-48) naïve vs unexposed	3	0.03936	t-test
4B	His-GFP (0-24) exposed vs unexposed	3	0.02778	t-test
4B	His-GFP (24-48) exposed vs unexposed	3	0.0006568	t-test
4B	CS (24-48) naive vs unexposed	3	0.0228	t-test
5D	Female exposed vs unexposed	3 replicates (300 flies total)	0.05658	chi-square
5D	Male exposed vs unexposed	3 replicates (60 flies total)	0.233	chi-square
5E	CS (+ yeast) exposed vs unexposed	3	0.02427	t-test
5H	CS (+yeast) exposed vs unexposed	3	0.007001	t-test
6A	Drice[RNAi] (0-24) exposed vs unexposed	24	0.5254	t-test
6A	Drice[RNAi] (24-48) exposed vs unexposed	24	0.01624	t-test
6A	His-GFP (24-48) naïve vs unexposed	24	4.6e-12	t-test
6B	Dcp-1[RNAi] (0-24) exposed vs unexposed	24	0.001829	t-test
6B	Dcp-1[RNAi] (24-48) exposed vs unexposed	24	0.2002	t-test
6B	His-GFP (24-48) naïve vs unexposed	24	7.813e-14	t-test
6C	His-GFP (0-24) exposed vs unexposed	24	3.051e-14	t-test
6C	His-GFP (24-48) exposed vs unexposed	24	4.031e-10	t-test
6C	Drice[RNAi] (24-48) naïve vs unexposed	24	0.3602	t-test
6D	His-GFP (0-24) exposed vs unexposed	24	2.2e-16	t-test
6D	His-GFP (24-48) exposed vs unexposed	24	1.091e-12	t-test
6D	Dcp-1[RNAi] (24-48) naïve vs unexposed	24	1.356e-06	t-test
6E	Dcp-1[2] (0-24) exposed vs unexposed	24	0.02078	t-test
6E	Dcp-1[2] (24-48) exposed vs unexposed	24	0.04798	t-test
6E	His-GFP (24-48) naïve vs unexposed	24	4.925e-16	t-test
6F	His-GFP (0-24) exposed vs unexposed	24	2.2e-16	t-test
6F	His-GFP (24-48) exposed vs unexposed	24	2.2e-16	t-test
6F	Dcp-1[2] (24-48) naïve vs unexposed	24	0.04625	t-test
7A	Or83b (0-24) exposed vs unexposed	24	1.476e-09	t-test
7A	Or83b (24-48) exposed vs unexposed	24	1.157e-08	t-test
7A	His-GFP (24-48) naïve vs unexposed	24	8.547e-08	t-test
7B	His-GFP (0-24) exposed vs unexposed	24	1.269e-11	t-test
7B	His-GFP (24-48) exposed vs unexposed	24	1.547e-08	t-test
7B	Or83b (24-48) naïve vs unexposed	24	1.418e-05	t-test
7C	ninaB (0-24) exposed vs unexposed	24	0.5131	t-test
7C	ninaB (24-48) exposed vs unexposed	24	0.5863	t-test
7C	His-GFP (24-48) naïve vs unexposed	24	0.001224	t-test
7D	His-GFP (0-24) exposed vs unexposed	24	5.981e-11	t-test
7D	His-GFP (24-48) exposed vs unexposed	24	8.875e-10	t-test
7D	ninaB (24-48) naïve vs unexposed	24	0.08397	t-test
8B	CS (0-24) dark exposed vs unexposed	24	0.318289	t-test
8B	CS (24-48) dark exposed vs unexposed	24	0.728297	t-test
8B	His-GFP (24-48) dark naïve vs unexposed	24	0.172885	t-test
8D	CS (0-24) dark exposed vs unexposed	24	1.07996e-06	t-test
8D	CS (24-48) light exposed vs unexposed	24	0.251775	t-test
8D	His-GFP (24-48) light naïve vs unexposed	24	0.244638	t-test
8E	CS (0-24) light exposed vs unexposed	24	6.24043e-20	t-test
8E	CS (24-48) dark exposed vs unexposed	24	9.03038e-09	t-test
8E	His-GFP (24-48) dark naïve vs unexposed	24	2.02684e-17	t-test
9B	CS (0-24) exposed vs unexposed	10	3.36578e-06	t-test
9B	CS (24-48) exposed vs unexposed	10	5.9616e-07	t-test
9B	His-GFP (24-48) naïve vs unexposed	10	6.42197e-07	t-test
9C	His-GFP (0-24) exposed vs unexposed	10	9.26252e-05	t-test
9C	His-GFP (24-48) exposed vs unexposed	10	6.44758e-06	t-test
9C	CS (24-48) naïve vs unexposed	10	1.73007e-05	t-test
10C	Wg[1] 1-wing (0-24) exposed vs unexposed	18	1.297e-08	t-test
10C	Wg[1] 1-wing (24-48) exposed vs unexposed	18	2.75e-07	t-test
10C	His-GFP (24-48) naïve vs unexposed	18	6.135e-05	t-test
10F	CS removed wings (0-24) exposed vs unexposed	24	2.2e-16	t-test
10F	CS removed wings (24-48) exposed vs unexposed	24	1.027e-12	t-test
10F	His-GFP (24-48) naïve vs unexposed	24	4.435e-06	t-test
10H	Rpr (0-24) exposed vs unexposed	24	1.102e-14	t-test
10H	Rpr (24-48) exposed vs unexposed	24	2.2e-16	t-test
10H	His-GFP (24-48) naïve vs unexposed	24	0.002492	t-test
11A	ewg[1] (0-24) exposed vs unexposed	24	3.79241e-10	t-test
11A	ewg[1] (24-48) exposed vs unexposed	24	1.98251e-16	t-test
11A	His-GFP (24-48) naïve vs unexposed	24	0.858562	t-test
11B	His-GFP (0-24) exposed vs unexposed	24	4.26929e-17	t-test
11B	His-GFP (24-48) exposed vs unexposed	24	2.47466e-16	t-test
11B	ewg[1] (24-48) naïve vs unexposed	24	2.38876e-17	t-test
11C	ewg[2] (0-24) exposed vs unexposed	24	3.04169e-14	t-test
11C	ewg[2] (24-48) exposed vs unexposed	24	4.70083e-12	t-test
11C	His-GFP (24-48) naïve vs unexposed	24	2.38741e-05	t-test
11D	His-GFP (0-24) exposed vs unexposed	24	2.18875e-13	t-test
11D	His-GFP (24-48) exposed vs unexposed	24	1.21149e-14	t-test
11D	ewg[2] (24-48) naïve vs unexposed	24	3.39811e-14	t-test
11E	ewg[NS4] (0-24) exposed vs unexposed	24	2.93178e-12	t-test
11E	ewg[NS4] (24-48) exposed vs unexposed	24	7.60773e-12	t-test
11E	His-GFP (24-48) naïve vs unexposed	24	0.0359345	t-test
11F	His-GFP (0-24) exposed vs unexposed	24	1.51264e-17	t-test
11F	His-GFP (24-48) exposed vs unexposed	24	1.06294e-14	t-test
11F	ewg[NS4] (24-48) naïve vs unexposed	24	3.52389e-18	t-test
12A	Orb2 (0-24) exposed vs unexposed	24	1.797e-15	t-test
12A	Orb2 (24-48) exposed vs unexposed	24	0.01496	t-test
12A	His-GFP (24-48) naïve vs unexposed	24	0.1971	t-test
12B	His-GFP (0-24) exposed vs unexposed	24	1.589e-11	t-test
12B	His-GFP (24-48) exposed vs unexposed	24	1.087e-05	t-test
12B	Orb2 (24-48) naïve vs unexposed	24	0.372	t-test
12C	rut (0-24) exposed vs unexposed	24	4.086e-09	t-test
12C	rut (24-48) exposed vs unexposed	24	0.4563	t-test
12C	His-GFP (24-48) naïve vs unexposed	24	0.8213	t-test
12D	His-GFP (0-24) exposed vs unexposed	24	1.679e-14	t-test
12D	His-GFP (24-48) exposed vs unexposed	24	2.974e-05	t-test
12D	rut (24-48) exposed vs unexposed	24	3.34e-07	t-test
12E	dnc (0-24) exposed vs unexposed	24	2.749e-07	t-test
12E	dnc (24-48) exposed vs unexposed	24	0.2145	t-test
12E	His-GFP (24-48) naïve vs unexposed	24	0.2192	t-test
12F	His-GFP (0-24) exposed vs unexposed	24	1.357e-12	t-test
12F	His-GFP (24-48) exposed vs unexposed	24	1.605e-08	t-test
12F	dnc (24-48) naïve vs unexposed	24	7.918e-07	t-test
12G	Adf1 (0-24) exposed vs unexposed	24	4.38e-10	t-test
12G	Adf1 (24-48) exposed vs unexposed	24	0.635	t-test
12G	His-GFP (24-48) naïve vs unexposed	24	0.5915	t-test
12H	His-GFP (0-24) exposed vs unexposed	24	9.7e-12	t-test
12H	His-GFP (24-48) exposed vs unexposed	24	8.169e-08	t-test
12H	Adf1 (24-48) naïve vs unexposed	24	6.313e-10	t-test
12I	FMR1[B55] (0-24) exposed vs unexposed	24	4.14535e-19	t-test
12I	FMR1[B55] (24-48) exposed vs unexposed	24	8.20647e-13	t-test
12I	His-GFP (24-48) naïve vs unexposed	24	0.00195138	t-test
12J	His-GFP (0-24) exposed vs unexposed	24	1.20432e-18	t-test
12J	His-GFP (24-48) exposed vs unexposed	24	2.00706e-15	t-test
12J	FMR1[B55] (24-48) naïve vs unexposed	24	0.484004	t-test
12K	amn[1] (0-24) exposed vs unexposed	24	1.77653e-22	t-test
12K	amn[1] (24-48) exposed vs unexposed	24	0.369213	t-test
12K	His-GFP (24-48) naïve vs unexposed	24	0.735325	t-test
12L	His-GFP (0-24) exposed vs unexposed	24	5.99243e-17	t-test
12L	His-GFP (24-48) exposed vs unexposed	24	5.86493e-13	t-test
12L	amn[1] (24-48) naïve vs unexposed	24	0.189805	t-test
12M	Orb2 (0-24) exposed vs unexposed	3	0.001166	t-test
12M	Orb2 (24-48) exposed vs unexposed	3	0.9213	t-test
13A	CS (0-24) exposed vs unexposed	24	2.2e-16	t-test
13A	CS headless (24-48) exposed vs unexposed	24	0.1357	t-test
13A	His-GFP (24-48) naïve vs unexposed	24	0.8364	t-test
13D	TeTx (0-24) exposed vs unexposed	21	1.536e-09	t-test
13D	TeTx (24-48) exposed vs unexposed	21	0.8325	t-test
13D	His-GFP (24-48) naïve vs unexposed	21	0.7501	t-test
14A	Orb2 [RNAi] (0-24) exposed vs unexposed	24	2.39895e-13	t-test
14A	Orb2 [RNAi] (24-48) exposed vs unexposed	24	0.0186442	t-test
14A	His-GFP (24-48) naïve vs unexposed	24	0.233394	t-test
14B	His-GFP (0-24) exposed vs unexposed	24	3.91437e-11	t-test
14B	His-GFP (24-48) exposed vs unexposed	24	1.15478e-19	t-test
14B	Orb2[RNAi] (24-48) naïve vs unexposed	24	0.0348097	t-test
14C	white [RNAi] (0-24) exposed vs unexposed	24	1.3353e-16	t-test
14C	white [RNAi] (24-48) exposed vs unexposed	24	1.00356e-17	t-test
14C	His-GFP (24-48) naïve vs unexposed	24	1.23192e-19	t-test
14D	His-GFP (0-24) exposed vs unexposed	24	6.75649e-14	t-test
14D	His-GFP (24-48) exposed vs unexposed	24	2.20514e-19	t-test
14D	white [RNAi] (24-48) naïve vs unexposed	24	2.27979e-17	t-test
15A	UAS-GFP +RU486 (0-24) exposed vs unexposed	24	2.0176e-18	t-test
15A	UAS-GFP +RU486 (24-48) exposed vs unexposed	24	5.39714e-16	t-test
15A	His-GFP (24-48) +RU486 naïve vs unexposed	24	6.68939e-17	t-test
15B	His-GFP (0-24) +RU486 exposed vs unexposed	24	7.99179e-15	t-test
15B	His-GFP (24-48) +RU486 exposed vs unexposed	24	2.98511e-25	t-test
15B	UAS-GFP +RU486 (24-48) naïve vs unexposed	24	1.15219e-14	t-test
15C	UAS-GFP +methanol (0-24) exposed vs unexposed	24	8.902e-18	t-test
15C	UAS-GFP +methanol (24-48) exposed vs unexposed	24	1.03493e-16	t-test
15C	His-GFP (24-48) +methanol naïve vs unexposed	24	9.26439e-19	t-test
15D	His-GFP (0-24) +methanol exposed vs unexposed	24	5.64236e-19	t-test
15D	His-GFP (24-48) +methanol exposed vs unexposed	24	1.44245e-15	t-test
15D	UAS-GFP +methanol (24-48) naïve vs unexposed	24	4.09709e-21	t-test
16A	Orb2 [RNAi] +RU486 (0-24) exposed vs unexposed	24	1.86826e-21	t-test
16A	Orb2 [RNAi] +RU486 (24-48) exposed vs unexposed	24	0.00346039	t-test
16A	His-GFP (24-48) +RU486 naïve vs unexposed	24	1.94468e-05	t-test
16B	His-GFP (0-24) +RU486 exposed vs unexposed	24	6.33136e-17	t-test
16B	His-GFP (24-48) +RU486 exposed vs unexposed	24	5.88068e-21	t-test
16B	Orb2[RNAi] +RU486 (24-48) naïve vs unexposed	24	1.88353e-08	t-test
16C	Orb2 [RNAi] +methanol (0-24) exposed vs unexposed	24	3.11519e-15	t-test
16C	Orb2 [RNAi] +methanol (24-48) exposed vs unexposed	24	6.4573e-17	t-test
16C	His-GFP (24-48) +methanol naïve vs unexposed	24	3.40421e-17	t-test
16D	His-GFP (0-24) +methanol exposed vs unexposed	24	5.76371e-18	t-test
16D	His-GFP (24-48) +methanol exposed vs unexposed	24	7.90057e-17	t-test
16D	Orb2[RNAi] +methanol (24-48) naïve vs unexposed	24	1.14372e-15	t-test
16E	white [RNAi] +RU486 (0-24) exposed vs unexposed	24	4.64046e-16	t-test
16E	white [RNAi] +RU486 (24-48) exposed vs unexposed	24	1.52536e-16	t-test
16E	His-GFP (24-48) +RU486 naïve vs unexposed	24	9.11086e-14	t-test
16F	His-GFP (0-24) +RU486 exposed vs unexposed	24	2.31503e-14	t-test
16F	His-GFP (24-48) +RU486 exposed vs unexposed	24	5.44362e-15	t-test
16F	white [RNAi] +RU486 (24-48) naïve vs unexposed	24	1.17501e-15	t-test
16G	white [RNAi] +methanol (0-24) exposed vs unexposed	24	9.82081e-19	t-test
16G	white [RNAi] +methanol (24-48) exposed vs unexposed	24	1.85407e-15	t-test
16G	His-GFP (24-48) +methanol naïve vs unexposed	24	1.24922e-19	t-test
16H	His-GFP (0-24) +methanol exposed vs unexposed	24	7.40752e-20	t-test
16H	His-GFP (24-48) +methanol exposed vs unexposed	24	3.09555e-17	t-test
16H	white [RNAi] +methanol (24-48) naïve vs unexposed	24	2.15353e-16	t-test
