# Supplementary material for: Social communication of predator-induced changes in Drosophila behavior and germ line physiology
Source: eLife journal article supplement (doi:10.7554/elife.07423), 2015-05-13
Supplement: supp [file elife_poa_e07423_Supplementary_File_15.xlsx]

## Sheet: Sheet1
Supplementary File 15: Corresponding P-values generated from t-tests are shown for supplementary figures. Comparison groups, sample size, and P-values are shown for a corresponding figure
Corresponding figure	Comparison groups	Sample size	p-value	Statistical test
S-1C	CS (0-24) exposed vs unexposed	24	2.187e-14	t-test
S-1C	CS (24-48) exposed vs unexposed	24	2.579e-15	t-test
S-1C	His-GFP (24-48) naïve vs unexposed	24	1.986e-12	t-test
S-1D	His-GFP (0-24) exposed vs unexposed	24	4.688e-11	t-test
S-1D	His-GFP (24-48) exposed vs unexposed	24	5.509e-08	t-test
S-1D	CS (24-48) naïve vs unexposed	24	3.605e-13	t-test
S-1E	His-GFP (0-24) exposed vs unexposed	24	2.087e-12	t-test
S-1E	His-GFP (24-48) exposed vs unexposed	24	2.2e-16	t-test
S-1E	CS (24-48) naïve vs unexposed	24	1.309e-13	t-test
S-1F	CS (0-24) exposed vs unexposed	24	7.909e-09	t-test
S-1F	CS (24-48) exposed vs unexposed	24	1.397e-12	t-test
S-1F	His-GFP (24-48) naïve vs unexposed	24	3.681e-13	t-test
S-1G	His-GFP (0-24) exposed vs unexposed	24	3.479e-09	t-test
S-1G	His-GFP (24-48) exposed vs unexposed	24	6.9e-11	t-test
S-1G	CS (24-48) naïve vs unexposed	24	1.625e-09	t-test
S-1H	His-GFP (24-48) naïve vs unexposed	24	0.07523	t-test
S-1I	CS (24-48) naïve vs unexposed	24	9.078e-05	t-test
S-2	His-GFP (0-24) exposed vs unexposed	24	3.059e-15	t-test
S-2	His-GFP (24-48) exposed vs unexposed	24	2.2e-16	t-test
S-2	CS (24-48) naïve vs unexposed	24	2.2e-16	t-test
S-2	CS (48-72) naïve vs unexposed	24	2.2e-16	t-test
S-2	His-GFP (48-72) naïve vs unexposed	24	0.01667	t-test
S-6A	UAS-Dcp1[RNAi] (0-24) exposed vs unexposed	24	4.743e-14	t-test
S-6A	UAS-Dcp1[RNAi] (24-48) exposed vs unexposed	24	3.251e-08	t-test
S-6A	His-GFP (24-48) naïve vs unexposed	24	1.073e-09	t-test
S-6B	UAS-Drice[RNAi] (0-24) exposed vs unexposed	24	4.334e-11	t-test
S-6B	UAS-Drice[RNAi] (24-48) exposed vs unexposed	24	1.244e-11	t-test
S-6B	His-GFP (24-48) naïve vs unexposed	24	5.149e-06	t-test
S-6C	Matα-GAL4 (0-24) exposed vs unexposed	24	2.36e-12	t-test
S-6C	Matα-GAL4 (24-48) exposed vs unexposed	24	9.767e-11	t-test
S-6C	His-GFP (24-48) naïve vs unexposed	24	5.326e-11	t-test
S-6D	His-GFP (0-24) exposed vs unexposed	24	2.2e-16	t-test
S-6D	His-GFP (24-48) exposed vs unexposed	24	2.125e-09	t-test
S-6D	UAS-Dcp1[RNAi] (24-48) naïve vs unexposed	24	1.671e-12	t-test
S-6E	His-GFP (0-24) exposed vs unexposed	24	3.263e-16	t-test
S-6E	His-GFP (24-48) exposed vs unexposed	24	1.951e-08	t-test
S-6E	UAS-Drice[RNAi] (24-48) naïve vs unexposed	24	3.437e-10	t-test
S-6F	His-GFP (0-24) exposed vs unexposed	24	2.2e-16	t-test
S-6F	His-GFP (24-48) exposed vs unexposed	24	3.465e-12	t-test
S-6F	Matα-Gal4 (24-48) naïve vs unexposed	24	7.742e-11	t-test
S-6G	Dcp-1[3] (0-24) exposed vs unexposed	24	0.6884	t-test
S-6G	DCP-1[3] (24-48) exposed vs unexposed	24	1.181e-15	t-test
S-6G	His-GFP (24-48) naïve vs unexposed	24	7.068e-11	t-test
S-6H	His-GFP (0-24) exposed vs unexposed	24	2.2e-16	t-test
S-6H	His-GFP (24-48) exposed vs unexposed	24	1.517e-14	t-test
S-6H	DCP-1[3] (24-48) naïve vs unexposed	24	0.09418	t-test
S-6A	Dcp1[RNAi] (0-24) exposed vs unexposed	3	0.6852	t-test
S-6A	Dcp1[RNAi] (24-48) exposed vs unexposed	3	0.1798	t-test
S-6A	His-GFP (24-48) naïve vs unexposed	3	0.0008282	t-test
S-8A	His-GFP (0-24)dark exposed vs unexposed	24	0.0103401	t-test
S-8A	His-GFP (24-48) dark exposed vs unexposed	24	0.42611	t-test
S-8A	CS (24-48) dark naïve vs unexposed	24	0.880959	t-test
S-8B	His-GFP (0-24) dark exposed vs unexposed	24	6.79154e-06	t-test
S-8B	His-GFP (24-48) light exposed vs unexposed	24	0.000184857	t-test
S-8B	CS (24-48) light naïve vs unexposed	24	4.96838e-05	t-test
S-8C	His-GFP (0-24) light exposed vs unexposed	24	5.17923e-22	t-test
S-8C	His-GFP (24-48) dark exposed vs unexposed	24	3.60192e-14	t-test
S-8C	CS (24-48) dark naïve vs unexposed	24	7.12899e-12	t-test
S-107F	Wg[1] 2-wings (0-24) exposed vs unexposed	24	3.638e-06	t-test
S-10F	Wg[1] 2-wings (24-48) exposed vs unexposed	24	2.877e-12	t-test
S-10F	His-GFP (24-48) naïve vs unexposed	24	2.706e-14	t-test
S-10G	His-GFP (0-24) exposed vs unexposed	24	2.2e-16	t-test
S-10G	His-GFP (24-48) exposed vs unexposed	24	1.067e-14	t-test
S-10G	Rpr (24-48) naïve vs unexposed	24	2.2e-16	t-test
S-12A	dnc[ML] (0-24) exposed vs unexposed	24	4.11595e-16	t-test
S-12A	dnc[ML] (24-48) exposed vs unexposed	24	0.0960514	t-test
S-12A	His-GFP (24-48) naïve vs unexposed	24	0.387407	t-test
S-12C	His-GFP (0-24) exposed vs unexposed	24	9.80032e-16	t-test
S-12C	His-GFP (24-48) exposed vs unexposed	24	3.32681e-19	t-test
S-12C	dnc[ML] (24-48) naïve vs unexposed	24	2.28505e-11	t-test
S-12B	rut[2080] (0-24) exposed vs unexposed	24	4.61113e-15	t-test
S-12B	rut[2080] (24-48) exposed vs unexposed	24	0.418117	t-test
S-12B	His-GFP (24-48) naïve vs unexposed	24	0.191645	t-test
S-12D	His-GFP (0-24) exposed vs unexposed	24	9.61046e-16	t-test
S-12D	His-GFP (24-48) exposed vs unexposed	24	3.56165e-15	t-test
S-12D	rut[2080] (24-48) naïve vs unexposed	24	1.38385e-07	t-test
S-12E	FMR1[3] (0-24) exposed vs unexposed	24	1.93266e-08	t-test
S-12E	FMR1[3] (24-48) exposed vs unexposed	24	0.659152	t-test
S-12E	His-GFP (24-48) naïve vs unexposed	24	0.818671	t-test
S-12F	His-GFP (0-24) exposed vs unexposed	24	1.20432e-18	t-test
S-12F	His-GFP (24-48) exposed vs unexposed	24	2.00706e-15	t-test
S-12F	FMR1[3] (24-48) naïve vs unexposed	24	0.484004	t-test
S-12G	amn[X8] (0-24) exposed vs unexposed	24	3.867e-14	t-test
S-12G	amn[X8] (24-48) exposed vs unexposed	24	0.241792	t-test
S-12G	His-GFP (24-48) naïve vs unexposed	24	0.705785	t-test
S-12H	His-GFP (0-24) exposed vs unexposed	24	5.79302e-20	t-test
S-12H	His-GFP (24-48) exposed vs unexposed	24	1.66609e-14	t-test
S-12H	amn[X8] (24-48) naïve vs unexposed	24	0.000357103	t-test
S-13A	OK107-GAL4 (0-24) exposed vs unexposed	24	2.2e-16	t-test
S-13A	OK107-GAL4 (24-48) exposed vs unexposed	24	6.597e-13	t-test
S-13A	His-GFP (24-48) naïve vs unexposed	24	1.496e-14	t-test
S-13B	His-GFP (0-24) exposed vs unexposed	24	1.718e-15	t-test
S-13B	His-GFP (24-48) exposed vs unexposed	24	8.628e-14	t-test
S-13B	OK107-GAL4 (24-48) naïve vs unexposed	24	6.269e-13	t-test
S-13C	OK107-GAL4/+ (0-24) exposed vs unexposed	24	1.63188e-17	t-test
S-13C	OK107-GAL4/+ (24-48) exposed vs unexposed	24	4.35189e-21	t-test
S-13C	His-GFP (24-48) naïve vs unexposed	24	2.31412e-20	t-test
S-13D	His-GFP (0-24) exposed vs unexposed	24	3.26449e-19	t-test
S-13D	His-GFP (24-48) exposed vs unexposed	24	1.25593e-18	t-test
S-13D	OK107-GAL4/+ (24-48) naïve vs unexposed	24	8.08092e-15	t-test
S-13E	UAS-Tetx (0-24) exposed vs unexposed	24	3.895e-13	t-test
S-13E	UAS-Tetx (24-48) exposed vs unexposed	24	6.38e-16	t-test
S-13E	His-GFP (24-48) naïve vs unexposed	24	2.834e-15	t-test
S-13F	His-GFP (0-24) exposed vs unexposed	24	2.2e-16	t-test
S-13F	His-GFP (24-48) exposed vs unexposed	24	4.773e-15	t-test
S-13F	UAS-Tetx (24-48) naïve vs unexposed	24	9.398e-15	t-test
S-13G	UAS-Tetx/+ (0-24) exposed vs unexposed	24	8.70376e-19	t-test
S-13G	UAS-Tetx/+ (24-48) exposed vs unexposed	24	1.49877e-19	t-test
S-13G	His-GFP (24-48) naïve vs unexposed	24	2.06108e-20	t-test
S-13H	His-GFP (0-24) exposed vs unexposed	24	3.40778e-21	t-test
S-13H	His-GFP (24-48) exposed vs unexposed	24	5.57167e-22	t-test
S-13H	UAS-Tetx/+ (24-48) naïve vs unexposed	24	9.71595e-22	t-test
S-13I	TeTx (0-24) exposed vs unexposed	24	1.25153e-20	t-test
S-13I	TeTx (24-48) exposed vs unexposed	24	0.0111238	t-test
S-13I	His-GFP (24-48) naïve vs unexposed	24	0.0011397	t-test
S-13J	His-GFP (0-24) exposed vs unexposed	24	1.03503e-16	t-test
S-13J	His-GFP (24-48) exposed vs unexposed	24	7.03183e-19	t-test
S-13J	Tetx (24-48) naïve vs unexposed	24	0.838847	t-test
S-13K	His-GFP (0-24) exposed vs unexposed	24	2.2e-16	t-test
S-13K	His-GFP (24-48) exposed vs unexposed	24	1.667e-15	t-test
S-13K	Tetx (24-48) naïve vs unexposed	24	6.716e-06	t-test
S-14A	UAS-Orb2 [RNAi] (0-24) exposed vs unexposed	24	3.60039e-14	t-test
S-14A	UAS-Orb2 [RNAi] (24-48) exposed vs unexposed	24	3.70458e-13	t-test
S-14A	His-GFP (24-48) naïve vs unexposed	24	5.08401e-19	t-test
S-14B	His-GFP (0-24) exposed vs unexposed	24	3.01203e-17	t-test
S-14B	His-GFP (24-48) exposed vs unexposed	24	3.73246e-19	t-test
S-14B	UAS-Orb2[RNAi] (24-48) naïve vs unexposed	24	3.35402e-20	t-test
S-14C	white [RNAi] (0-24) exposed vs unexposed	24	5.41375e-19	t-test
S-14C	white [RNAi] (24-48) exposed vs unexposed	24	1.60936e-16	t-test
S-14C	His-GFP (24-48) naïve vs unexposed	24	5.7412e-16	t-test
S-14D	His-GFP (0-24) exposed vs unexposed	24	7.33557e-15	t-test
S-14D	His-GFP (24-48) exposed vs unexposed	24	1.26648e-19	t-test
S-14D	white [RNAi] (24-48) naïve vs unexposed	24	4.99009e-20	t-test
S-15A	MB Gene-switch (0-24) exposed vs unexposed	24	2.68875e-17	t-test
S-15A	MB Gene-switch (24-48) exposed vs unexposed	24	1.31199e-14	t-test
S-15A	His-GFP (24-48) naïve vs unexposed	24	6.51503e-18	t-test
S-15B	His-GFP (0-24) exposed vs unexposed	24	1.02969e-19	t-test
S-15B	His-GFP (24-48) exposed vs unexposed	24	2.04334e-17	t-test
S-15B	MB Gene-switch (24-48) naïve vs unexposed	24	8.28284e-20	t-test
S-15C	MB Gene-switch/+ (0-24) exposed vs unexposed	24	1.45836e-15	t-test
S-15C	MB Gene-switch/+ (24-48) exposed vs unexposed	24	9.46919e-21	t-test
S-15C	His-GFP (24-48) naïve vs unexposed	24	1.09095e-16	t-test
S-15D	His-GFP (0-24) exposed vs unexposed	24	8.42398e-21	t-test
S-15D	His-GFP (24-48) exposed vs unexposed	24	4.04351e-18	t-test
S-15D	MB Gene-switch/+ (24-48) naïve vs unexposed	24	1.88378e-18	t-test
S-16A	white [RNAi] +RU486 (0-24) exposed vs unexposed	24	1.72839e-18	t-test
S-16A	white [RNAi] +RU486 (24-48) exposed vs unexposed	24	3.13458e-14	t-test
S-16A	His-GFP (24-48) +RU486 naïve vs unexposed	24	9.66504e-14	t-test
S-16B	His-GFP (0-24) +RU486 exposed vs unexposed	24	2.94781e-22	t-test
S-16B	His-GFP (24-48) +RU486 exposed vs unexposed	24	2.34066e-16	t-test
S-16B	white [RNAi] +RU486 (24-48) naïve vs unexposed	24	1.133e-18	t-test
S-16C	white [RNAi] +methanol (0-24) exposed vs unexposed	24	1.68312e-16	t-test
S-16C	white [RNAi] +methanol (24-48) exposed vs unexposed	24	9.8662e-17	t-test
S-16C	His-GFP (24-48) +methanol naïve vs unexposed	24	6.04272e-19	t-test
S-16D	His-GFP (0-24) +methanol exposed vs unexposed	24	3.17454e-15	t-test
S-16D	His-GFP (24-48) +methanol exposed vs unexposed	24	1.56182e-17	t-test
S-16D	white [RNAi] +methanol (24-48) naïve vs unexposed	24	6.56207e-14	t-test
