# Supplementary material for: Social communication of predator-induced changes in Drosophila behavior and germ line physiology
Source: eLife journal article supplement (doi:10.7554/elife.07423), 2015-05-13
Supplement: supp [file elife_poa_e07423_Supplementary_File_16.xlsx]

## Sheet: Sheet1
Supplementary File 16: Corresponding P-values generated from t-tests are shown for supplementary files. Comparison groups, sample size, and P-values are shown for a corresponding file.
Corresponding figure	Comparison groups	Sample size	p-value	Statistical test
Table S1	CS (0-24) stage 2-3 exposed vs unexposed	3	0.1986	t-test
Table S1	CS (0-24) stage 7-8 exposed vs unexposed	3	4.132e-05	t-test
Table S1	CS (0-24) stage 12-13 exposed vs unexposed	3	0.4365	t-test
Table S2	His-GFP (0-24) stage 2-3 exposed vs unexposed	3	0.4226	t-test
Table S2	His-GFP (0-24) stage 7-8 exposed vs unexposed	3	0.02778	t-test
Table S2	His-GFP (0-24) stage 12-13 exposed vs unexposed	3	0.6663	t-test
Table S3	CS (teacher) stage 2-3 exposed vs unexposed	3	0.1856	t-test
Table S3	CS (teacher) stage 7-8 exposed vs unexposed	3	0.01331	t-test
Table S3	CS (teacher) stage 12-13 exposed vs unexposed	3	0.585	t-test
Table S4	His-GFP (teacher) stage 2-3 exposed vs unexposed	3	0.1836	t-test
Table S4	His-GFP (teacher) stage 7-8 exposed vs unexposed	3	0.0006568	t-test
Table S4	His-GFP (teacher) stage 12-13 exposed vs unexposed	3	0.939	t-test
Table S5	CS with yeast (0-24) stage 2-3 exposed vs unexposed	3	0.4226	t-test
Table S5	CS with yeast (0-24) stage 7-8 exposed vs unexposed	3	0.007001	t-test
Table S5	CS with yeast (0-24) stage 12-13 exposed vs unexposed	3	0.935	t-test
Table S6	His-GFP (student) stage 2-3 naïve vs unexposed	3	na	na
Table S6	His-GFP (student) stage 7-8 naïve vs unexposed	3	0.03936	t-test
Table S6	His-GFP (student) stage 12-13 naïve vs unexposed	3	0.31	t-test
Table S7	CS (student) stage 2-3 naïve vs unexposed	3	0.4226	t-test
Table S7	CS (student) stage 7-8 naïve vs unexposed	3	0.0228	t-test
Table S7	CS (student) stage 12-13 naïve vs unexposed	3	0.5377	t-test
Table S8	dcp1[RNAi] (0-24) stage 2-3 exposed vs unexposed	3	na	na
Table S8	dcp1[RNAi] (0-24) stage 7-8 exposed vs unexposed	3	0.6852	t-test
Table S8	dcp1[RNAi] (0-24) stage 12-13 exposed vs unexposed	3	0.4637	t-test
Table S9	dcp1[RNAi] (teacher) stage 2-3 exposed vs unexposed	3	na	na
Table S9	dcp1[RNAi] (teacher) stage 7-8 exposed vs unexposed	3	0.1798	t-test
Table S9	dcp1[RNAi] (teacher) stage 12-13 exposed vs unexposed	3	0.8822	t-test
Table S10	His-GFP (student) stage 2-3 naïve vs unexposed	3	na	na
Table S10	His-GFP (student) stage 7-8 naïve vs unexposed	3	0.0008282	t-test
Table S10	His-GFP (student) stage 12-13 naïve vs unexposed	3	0.1623	t-test
Table S11	Orb2 (0-24) stage 2-3 exposed vs unexposed	3	0.4226	t-test
Table S11	Orb2 (0-24) stage 7-8 exposed vs unexposed	3	0.001166	t-test
Table S11	Orb2 (0-24) stage 12-13 exposed vs unexposed	3	0.9097	t-test
Table S12	Orb2 (24-48) stage 2-3 exposed vs unexposed	3	0.9987	t-test
Table S12	Orb2 (24-48) stage 7-8 exposed vs unexposed	3	0.9213	t-test
Table S12	Orb2 (24-48) stage 12-13 exposed vs unexposed	3	0.2797	t-test
