# Supplementary material for: Social communication of predator-induced changes in Drosophila behavior and germ line physiology
Source: eLife journal article supplement (doi:10.7554/elife.07423), 2015-05-13
Supplement: supp [file elife_poa_e07423_Supplementary_File_17.xlsx]

## Sheet: Sheet1
Supplementary File 17: Corresponding raw average egg counts corresponding to main figures are shown.
Corresponding figure	Comparison groups	Sample size	Average Egg Counts (unexposed v exposed
1B	w1118 exposed vs unexposed	24	25±1.54 vs 1±0.53
1B	OR exposed vs unexposed	24	57±2.84 vs 13±1.88
1B	CS exposed vs unexposed	24	65 ± 3.2 vs 13 ± 1.98
1B	His-GFP exposed vs unexposed	24	108±7.69 vs 18±1.97
1C	CS (0-24) exposed vs unexposed	24	53±3.35 vs 14±1.59
1C	CS (24-48) exposed vs unexposed	24	35±2.44 vs 19±1.33
1C	His-GFP (24-48) naïve vs unexposed	24	34±2.34 vs 6±0.86
2B	CS (0-24) exposed vs unexposed	24	73±3.89 vs 5±0.95
2B	CS (24-48) exposed vs unexposed	24	37±1.85 vs 14±1.30
2B	His-GFP (24-48) naïve vs unexposed	24	43±2.65 vs 13±1.14
2B	His-GFP (48-72) naïve vs unexposed	24	27±2.31 vs 13±1.74
2B	CS (48-72) naïve vs unexposed	24	20±1.68 vs 28±1.54
3B	CS (0-24) exposed vs unexposed	24	113±2.79 vs 17±1.35
3B	CS (24-48) exposed vs unexposed	24	69±3.05 vs 11±1.03
3B	His-GFP (24-48) naïve vs unexposed	24	61±1.86 vs 11±0.78
3B	CS (48-72) naïve vs unexposed	24	62±3.15 vs 12±0.55
3B	His-GFP (48-72) naïve vs unexposed	24	61±2.62 vs 19±1.36
3C	His-GFP (0-24) exposed vs unexposed	24	60±2.92 vs 5±0.59
3C	His-GFP (24-48) exposed vs unexposed	24	67±2.67 vs 9±0.71
3C	CS (24-48) naïve vs unexposed	24	54±1.82 vs 8±0.63
3C	His-GFP (48-72) naïve vs unexposed	24	54±1.25 vs 9±0.89
3C	CS (48-72) naïve vs unexposed	24	65±1.94 vs 9±0.72
5D	Female exposed vs unexposed	3 replicates (300 flies total)	98±0.65 vs 99±0.66
5D	Male exposed vs unexposed	3 replicates (60 flies total)	75±14.97 vs 82±6.53
5E	CS (+ yeast) exposed vs unexposed	3	1,648±239.77 vs 142±9.53
6A	Drice[RNAi] (0-24) exposed vs unexposed	24	33±5.15 vs 29±2.61
6A	Drice[RNAi] (24-48) exposed vs unexposed	24	44±3.62 vs 35±2.20
6A	His-GFP (24-48) naïve vs unexposed	24	54±3.85 vs 6±0.75
6B	Dcp-1[RNAi] (0-24) exposed vs unexposed	24	29±3.87 vs 43±2.59
6B	Dcp-1[RNAi] (24-48) exposed vs unexposed	24	47±2.67 vs 42±2.59
6B	His-GFP (24-48) naïve vs unexposed	24	49±2.97 vs 5±0.73
6C	His-GFP (0-24) exposed vs unexposed	24	66±3.34 vs 16±1.27
6C	His-GFP (24-48) exposed vs unexposed	24	44±3.60 vs 8±1.14
6C	Drice[RNAi] (24-48) naïve vs unexposed	24	37±2.07 vs 40±2.49
6D	His-GFP (0-24) exposed vs unexposed	24	78±3.07 vs 19±2.40
6D	His-GFP (24-48) exposed vs unexposed	24	84±5.39 vs 11±1.06
6D	Dcp-1[RNAi] (24-48) naïve vs unexposed	24	45±2.75 vs 68±3.02
6E	Dcp-1[2] (0-24) exposed vs unexposed	24	38±1.76 vs 45±2.194
6E	Dcp-1[2] (24-48) exposed vs unexposed	24	58±2.21 vs 67±3.66
6E	His-GFP (24-48) naïve vs unexposed	24	63±3.05 vs 7±0.79
6F	His-GFP (0-24) exposed vs unexposed	24	101±4.211 vs 17±1.910
6F	His-GFP (24-48) exposed vs unexposed	24	89±3.49 vs 10±0.08
6F	Dcp-1[2] (24-48) naïve vs unexposed	24	43±1.740 vs 53±4.36
7A	Orco[1] (0-24) exposed vs unexposed	24	57±4.06 vs 19±2.63
7A	Orco[1] (24-48) exposed vs unexposed	24	47±3.35 vs 19±1.62
7A	His-GFP (24-48) naïve vs unexposed	24	54±3.75 vs 24±2.49
7B	His-GFP (0-24) exposed vs unexposed	24	93±5.64 vs 30±2.57
7B	His-GFP (24-48) exposed vs unexposed	24	48±4.28 vs 13±1.37
7B	Orco[1] (24-48) naïve vs unexposed	24	41±4.36 vs 16±2.24
7C	ninaB (0-24) exposed vs unexposed	24	27±2.36 vs 30±2.88
7C	ninaB (24-48) exposed vs unexposed	24	28±2.44 vs 30±2.72
7C	His-GFP (24-48) naïve vs unexposed	24	35±2.89 vs 50±3.04
7D	His-GFP (0-24) exposed vs unexposed	24	78±5.59 vs 17.46±1.622
7D	His-GFP (24-48) exposed vs unexposed	24	51±3.59 vs 17±1.89
7D	ninaB (24-48) naïve vs unexposed	24	38±2.57 vs 46±3.88
8B	CS (0-24) dark exposed vs unexposed	24	81±2.53 vs 87±4.38
8B	CS (24-48) dark exposed vs unexposed	24	40±1.79 vs 44±1.60
8B	His-GFP (24-48) dark naïve vs unexposed	24	41±1.61 vs 40±1.75
8D	CS (0-24) light exposed vs unexposed	24	60±2.09 vs 6.21±0.61
8D	CS (24-48) dark exposed vs unexposed	24	40±1.71 vs 9±0.81
8D	His-GFP (24-48) dark naïve vs unexposed	24	40±2.00 vs 77±4.15
8E	CS (0-24) dark exposed vs unexposed	24	51±2.49 vs 79±4.07
8E	CS (24-48) light exposed vs unexposed	24	46±1.96 vs 50±2.59
8E	His-GFP (24-48) light naïve vs unexposed	24	39±2.11 vs 43±2.15
9B	CS (0-24) exposed vs unexposed	10	110±9.54 vs 21±2.37
9B	CS (24-48) exposed vs unexposed	10	186±13.53 vs 26±2.12
9B	His-GFP (24-48) naïve vs unexposed	10	172±13.21 vs 25±3.70
9C	His-GFP (0-24) exposed vs unexposed	10	159±20.63 vs 25±4.54
9C	His-GFP (24-48) exposed vs unexposed	10	185±18.52 vs 25±4.97
9C	CS (24-48) naïve vs unexposed	10	157±17.21 vs 20±3.15
10C	Wg[1] 1-wing (0-24) exposed vs unexposed	18	33±2.83 vs 7±1.05
10C	Wg[1] 1-wing (24-48) exposed vs unexposed	18	35±6.17 vs 9±1.87
10C	His-GFP (24-48) naïve vs unexposed	18	37±2.43 vs 56±3.34
10F	CS removed wings (0-24) exposed vs unexposed	24	65±2.80 vs 10±0.95
10F	CS removed wings (24-48) exposed vs unexposed	24	42±2.68 vs 7±0.92
10F	His-GFP (24-48) naïve vs unexposed	24	27±1.74 vs 50±3.64
10H	Rpr (0-24) exposed vs unexposed	24	32±1.85 vs 4±0.70
10H	Rpr (24-48) exposed vs unexposed	24	38±1.66 vs 5±0.51
10H	His-GFP (24-48) naïve vs unexposed	24	34±1.76 vs 43±2.15
11A	ewg[1] (0-24) exposed vs unexposed	24	52±4.50 vs 6±0.79
11A	ewg[1] (24-48) exposed vs unexposed	24	45±2.15 vs 7±0.87
11A	His-GFP (24-48) naïve vs unexposed	24	49±3.81 vs 48±3.05
11B	His-GFP (0-24) exposed vs unexposed	24	107±4.75 vs 8±0.77
11B	His-GFP (24-48) exposed vs unexposed	24	54±2.54 vs 5±0.46
11B	ewg[1] (24-48) naïve vs unexposed	24	60±2.56 vs 6±0.60
11C	ewg[2] (0-24) exposed vs unexposed	24	44±2.53 vs 6±0.84
11C	ewg[2] (24-48) exposed vs unexposed	24	50±3.47 vs 6±0.53
11C	His-GFP (24-48) naïve vs unexposed	24	44±2.07 vs 63±3.33
11D	His-GFP (0-24) exposed vs unexposed	24	50±3.08 vs 6±0.96
11D	His-GFP (24-48) exposed vs unexposed	24	53±2.86 vs 6±0.63
11D	ewg[2] (24-48) naïve vs unexposed	24	46±2.62 vs 7±0.78
11E	ewg[NS4] (0-24) exposed vs unexposed	24	50±3.5 vs 6±0.75
11E	ewg[NS4] (24-48) exposed vs unexposed	24	54±3.70 vs 9±0.09
11E	His-GFP (24-48) naïve vs unexposed	24	53±3.89 vs 66±4.50
11F	His-GFP (0-24) exposed vs unexposed	24	107±4.46 vs 6±0.62
11F	His-GFP (24-48) exposed vs unexposed	24	60±3.12 vs 7±0.54
11F	ewg[NS4] (24-48) naïve vs unexposed	24	55±2.11 vs 8±0.57
12A	Orb2 (0-24) exposed vs unexposed	24	17±0.80 vs 5±0.62
12A	Orb2 (24-48) exposed vs unexposed	24	34±2.17 vs 43±0.38
12A	His-GFP (24-48) naïve vs unexposed	24	35±3.22 vs 41±3.52
12B	His-GFP (0-24) exposed vs unexposed	24	75±3.89 vs 32±2.49
12B	His-GFP (24-48) exposed vs unexposed	24	47±4.25 vs 23±1.74
12B	Orb2 (24-48) naïve vs unexposed	24	34±2.88 vs 39±3.78
12C	rut (0-24) exposed vs unexposed	24	20±2.05 vs 1±0.43
12C	rut (24-48) exposed vs unexposed	24	36±4.57 vs 32±3.68
12C	His-GFP (24-48) naïve vs unexposed	24	22±2.59 vs 21±3.33
12D	His-GFP (0-24) exposed vs unexposed	24	69±3.91 vs 8±1.09
12D	His-GFP (24-48) exposed vs unexposed	24	31±2.15 vs 16±1.82
12D	rut (24-48) exposed vs unexposed	24	18±2.03 vs 45±3.83
12E	dnc (0-24) exposed vs unexposed	24	60±5.26 vs 22±2.42
12E	dnc (24-48) exposed vs unexposed	24	27±2.84 vs 30±2.78
12E	His-GFP (24-48) naïve vs unexposed	24	25±2.37 vs 30±4.02
12F	His-GFP (0-24) exposed vs unexposed	24	71±4.32 vs 17±1.65
12F	His-GFP (24-48) exposed vs unexposed	24	54±4.59 vs 16±1.67
12F	dnc (24-48) naïve vs unexposed	24	39±2.30 vs 82±6.37
12G	Adf1 (0-24) exposed vs unexposed	24	50±4.14 vs 10±1.67
12G	Adf1 (24-48) exposed vs unexposed	24	43±4.06 vs 49±5.34
12G	His-GFP (24-48) naïve vs unexposed	24	35±4.80 vs 32±2.91
12H	His-GFP (0-24) exposed vs unexposed	24	57±3.87 vs 12±1.51
12H	His-GFP (24-48) exposed vs unexposed	24	35±2.29 vs 16±1.76
12H	Adf1 (24-48) naïve vs unexposed	24	27±2.91 vs 61±3.13
12I	FMR1[B55] (0-24) exposed vs unexposed	24	89±4.05 vs 21±2.45
12I	FMR1[B55] (24-48) exposed vs unexposed	24	50±3.42 vs 50±2.69
12I	His-GFP (24-48) naïve vs unexposed	24	31±3.16 vs 33±3.39
12J	His-GFP (0-24) exposed vs unexposed	24	127±5.13 vs 20±2.39
12J	His-GFP (24-48) exposed vs unexposed	24	78±5.00 vs 9±0.76
12J	FMR1[B55] (24-48) naïve vs unexposed	24	60±3.00 vs 74±3.40
12K	amn[1] (0-24) exposed vs unexposed	24	45±1.67 vs 5±1.20
12K	amn[1] (24-48) exposed vs unexposed	24	42±2.07 vs 43±1.29
12K	His-GFP (24-48) naïve vs unexposed	24	39±1.64 vs 37±1.85
12L	His-GFP (0-24) exposed vs unexposed	24	90±3.98 vs 6±0.65
12L	His-GFP (24-48) exposed vs unexposed	24	57±3.57 vs 8±0.82
12L	amn[1] (24-48) naïve vs unexposed	24	56±2.05 vs 51±2.60
13A	CS (0-24) exposed vs unexposed	24	91±3.58 vs 18±1.76
13A	CS headless (24-48) exposed vs unexposed	24	53±4.41 vs 44±4.23
13A	His-GFP (24-48) naïve vs unexposed	24	22±2.33 vs 23±2.48
13D	TeTx (0-24) exposed vs unexposed	21	103±6.74 vs 34±3.53
13D	TeTx (24-48) exposed vs unexposed	21	71±3.67 vs 72±4.99
13D	His-GFP (24-48) naïve vs unexposed	21	61±4.51 vs 63±3.57
14A	Orb2 [RNAi] (0-24) exposed vs unexposed	24	98±5.63 vs 16±1.53
14A	Orb2 [RNAi] (24-48) exposed vs unexposed	24	61±2.78 vs 70±2.64
14A	His-GFP (24-48) naïve vs unexposed	24	60±3.15 vs 63±2.23
14B	His-GFP (0-24) exposed vs unexposed	24	49±3.80 vs 6±0.57
14B	His-GFP (24-48) exposed vs unexposed	24	44±1.67 vs 7±0.77
14B	Orb2[RNAi] (24-48) naïve vs unexposed	24	46±2.32 vs 53±2.72
14C	white [RNAi] (0-24) exposed vs unexposed	24	76±3.39 vs 8±0.69
14C	white [RNAi] (24-48) exposed vs unexposed	24	60±2.15 vs 9±0.74
14C	His-GFP (24-48) naïve vs unexposed	24	58±2.26 vs 8±0.45
14D	His-GFP (0-24) exposed vs unexposed	24	73±4.30 vs 7±0.69
14D	His-GFP (24-48) exposed vs unexposed	24	40±1.54 vs 7±0.70
14D	white [RNAi] (24-48) naïve vs unexposed	24	39±1.69 vs 7±0.62
15A	UAS-GFP +RU486 (0-24) exposed vs unexposed	24	89±3.45 vs 5±0.65
15A	UAS-GFP +RU486 (24-48) exposed vs unexposed	24	54±2.46 vs 4±0.52
15A	His-GFP (24-48) +RU486 naïve vs unexposed	24	45±2.04 vs 5±0.73
15B	His-GFP (0-24) +RU486 exposed vs unexposed	24	52±2.96 vs 3±0.58
15B	His-GFP (24-48) +RU486 exposed vs unexposed	24	38±1.03 vs 3±0.45
15B	UAS-GFP +RU486 (24-48) naïve vs unexposed	24	41±2.30 vs 3±0.37
15C	UAS-GFP +methanol (0-24) exposed vs unexposed	24	90±3.70 vs 4±0.44
15C	UAS-GFP +methanol (24-48) exposed vs unexposed	24	60±2.33 vs 4±0.58
15C	His-GFP (24-48) +methanol naïve vs unexposed	24	53±2.50 vs 6±0.74
15D	His-GFP (0-24) +methanol exposed vs unexposed	24	95±3.52 vs 7±0.69
15D	His-GFP (24-48) +methanol exposed vs unexposed	24	64±3.10 vs 8±0.64
15D	UAS-GFP +methanol (24-48) naïve vs unexposed	24	54±1.72 vs 7±0.60
16A	Orb2 [RNAi] +RU486 (0-24) exposed vs unexposed	24	116±3.42 vs 1±0.48
16A	Orb2 [RNAi] +RU486 (24-48) exposed vs unexposed	24	49±2.58 vs 65±2.18
16A	His-GFP (24-48) +RU486 naïve vs unexposed	24	46±2.00 vs 55±2.18
16B	His-GFP (0-24) +RU486 exposed vs unexposed	24	78±3.57 vs 3±0.62
16B	His-GFP (24-48) +RU486 exposed vs unexposed	24	44±1.58 vs 6±0.08
16B	Orb2[RNAi] +RU486 (24-48) naïve vs unexposed	24	46±2.12 vs 68±2.80
16C	Orb2 [RNAi] +methanol (0-24) exposed vs unexposed	24	85±4.58 vs 1±0.21
16C	Orb2 [RNAi] +methanol (24-48) exposed vs unexposed	24	62±2.68 vs 2±0.28
16C	His-GFP (24-48) +methanol naïve vs unexposed	24	57±2.61 vs 3±0.46
16D	His-GFP (0-24) +methanol exposed vs unexposed	24	87±3.54 vs 7±0.78
16D	His-GFP (24-48) +methanol exposed vs unexposed	24	46±2.11 vs 3±0.40
16D	Orb2[RNAi] +methanol (24-48) naïve vs unexposed	24	52±2.67 vs 3±0.39
16E	white [RNAi] +RU486 (0-24) exposed vs unexposed	24	60±2.94 vs 1±0.24
16E	white [RNAi] +RU486 (24-48) exposed vs unexposed	24	46±2.87 vs 2±0.28
16E	His-GFP (24-48) +RU486 naïve vs unexposed	24	43±2.05 vs 2±0.31
16F	His-GFP (0-24) +RU486 exposed vs unexposed	24	96±2.57 vs 2±0.49
16F	His-GFP (24-48) +RU486 exposed vs unexposed	24	44±2.42 vs 2±0.31
16F	white [RNAi] +RU486 (24-48) naïve vs unexposed	24	47±2.07 vs 2±0.30
16G	white [RNAi] +methanol (0-24) exposed vs unexposed	24	58±2.26 vs 3±0.50
16G	white [RNAi] +methanol (24-48) exposed vs unexposed	24	54±1.91 vs 4±0.40
16G	His-GFP (24-48) +methanol naïve vs unexposed	24	50±2.60 vs 4±0.50
16H	His-GFP (0-24) +methanol exposed vs unexposed	24	97±3.04 vs 5±0.61
16H	His-GFP (24-48) +methanol exposed vs unexposed	24	52±2.23 vs 5±0.52
16H	white [RNAi] +methanol (24-48) naïve vs unexposed	24	55±2.63 vs 5±0.66
