# Supplementary material for: Social communication of predator-induced changes in Drosophila behavior and germ line physiology
Source: eLife journal article supplement (doi:10.7554/elife.07423), 2015-05-13
Supplement: supp [file elife_poa_e07423_Supplementary_File_18.xlsx]

## Sheet: Sheet1
Supplementary File 18: Corresponding raw average egg counts corresponding to supplementary figures are shown.
Coresponding figure	Comparioson groups	Sample size	Average Egg Counts (unexposed v exposed
S-1C	CS (0-24) exposed vs unexposed	24	103±5.38 vs 21±1.66
S-1C	CS (24-48) exposed vs unexposed	24	64±3.32 vs 12±1.47
S-1C	His-GFP (24-48) naïve vs unexposed	24	65±4.24 vs 13±1.61
S-1D	His-GFP (0-24) exposed vs unexposed	24	104±7.69 vs 18±1.94
S-1D	His-GFP (24-48) exposed vs unexposed	24	62±4.82 vs 25±1.83
S-1D	CS (24-48) naïve vs unexposed	24	46±2.47 vs 14±1.34
S-1E	His-GFP (0-24) exposed vs unexposed	24	79±5.11 vs 14±1.54
S-1E	His-GFP (24-48) exposed vs unexposed	24	53±2.46 vs 12±1.33
S-1E	CS (24-48) naïve vs unexposed	24	53±2.92 vs 12±0.94
S-1F	CS (0-24) exposed vs unexposed	24	31±2.26 vs 10±1.65
S-1F	CS (24-48) exposed vs unexposed	24	36±1.79 vs 13±1.65
S-1F	His-GFP (24-48) naïve vs unexposed	24	37±1.62 vs 16±1.29
S-1G	His-GFP (0-24) exposed vs unexposed	24	36±2.06 vs 17±1.33
S-1G	His-GFP (24-48) exposed vs unexposed	24	37±2.07 vs 15±1.41
S-1G	CS (24-48) naïve vs unexposed	24	32±1.96 vs 13±1.42
S-1H	His-GFP (24-48) naïve vs unexposed	24	42±3.23 vs 35±2.46
S-1I	CS (24-48) naïve vs unexposed	24	26±2.63 vs 40±2.18
S-2	His-GFP (0-24) exposed vs unexposed	24	95±4.67 vs 13±0.92
S-2	His-GFP (24-48) exposed vs unexposed	24	59±2.21 vs 11±0.55
S-2	CS (24-48) naïve vs unexposed	24	59±1.65 vs 9±0.51
S-2	CS (48-72) naïve vs unexposed	24	41±1.55 vs 9±0.91
S-2	His-GFP (48-72) naïve vs unexposed	24	42±1.37 vs 50±2.69
S-6A	UAS-Dcp1[RNAi] (0-24) exposed vs unexposed	24	22±1.30 vs 4±0.62
S-6A	UAS-Dcp1[RNAi] (24-48) exposed vs unexposed	24	32±2.50 vs 12±0.97
S-6A	His-GFP (24-48) naïve vs unexposed	24	27±1.86 vs 10±1.08
S-6B	UAS-Drice[RNAi] (0-24) exposed vs unexposed	24	27±1.91 vs 5±1.15
S-6B	UAS-Drice[RNAi] (24-48) exposed vs unexposed	24	23±1.39 vs 8±0.94
S-6B	His-GFP (24-48) naïve vs unexposed	24	24±1.94 vs 12±1.24
S-6C	Matα-GAL4 (0-24) exposed vs unexposed	24	36±2.15 vs 11±1.35
S-6C	Matα-GAL4 (24-48) exposed vs unexposed	24	42±2.93 vs 12±1.38
S-6C	His-GFP (24-48) naïve vs unexposed	24	38±1.23 vs 15±1.31
S-6D	His-GFP (0-24) exposed vs unexposed	24	119±4.00 vs 29±1.09
S-6D	His-GFP (24-48) exposed vs unexposed	24	47±3.23 vs 17±1.25
S-6D	UAS-Dcp1[RNAi] (24-48) naïve vs unexposed	24	55±3.23 vs 16±1.49
S-6E	His-GFP (0-24) exposed vs unexposed	24	105±4.98 vs 25±3.06
S-6E	His-GFP (24-48) exposed vs unexposed	24	51±3.62 vs 22±1.32
S-6E	UAS-Drice[RNAi] (24-48) naïve vs unexposed	24	56±4.13 vs 15±1.59
S-6F	His-GFP (0-24) exposed vs unexposed	24	73±3.07 vs 20±2.78
S-6F	His-GFP (24-48) exposed vs unexposed	24	64±3.35 vs 24±1.58
S-6F	Matα-Gal4 (24-48) naïve vs unexposed	24	48±2.89 vs 18±1.66
S-6G	Dcp-1[3] (0-24) exposed vs unexposed	24	56±2.57 vs 56±2.30
S-6G	DCP-1[3] (24-48) exposed vs unexposed	24	40±2.73 vs 85±2.61
S-6G	His-GFP (24-48) naïve vs unexposed	24	50±3.72 vs 10±0.83
S-6H	His-GFP (0-24) exposed vs unexposed	24	116±4.91 vs 15±0.99
S-6H	His-GFP (24-48) exposed vs unexposed	24	85±4.55 vs 13±1.02
S-6H	DCP-1[3] (24-48) naïve vs unexposed	24	52±3.27 vs 60±3.38
S-8A	His-GFP (0-24)dark exposed vs unexposed	24	72±3.66 vs 87±4.27
S-8A	His-GFP (24-48) dark exposed vs unexposed	24	44±2.25 vs 41±2.06
S-8A	CS (24-48) dark naïve vs unexposed	24	43±1.86 vs 43±2.05
S-8B	His-GFP (0-24) light exposed vs unexposed	24	40±1.31 vs 5±0.68
S-8B	His-GFP (24-48) dark exposed vs unexposed	24	39±2.10 vs 9±0.89
S-8B	CS (24-48) dark naïve vs unexposed	24	40±1.56 vs 81±3.58
S-8C	His-GFP (0-24) dark exposed vs unexposed	24	53±2.63 vs 77±3.85
S-8C	His-GFP (24-48) light exposed vs unexposed	24	43±2.21 vs 58±2.92
S-8C	CS (24-48) light naïve vs unexposed	24	45±1.69 vs 58±2.32
S-107F	Wg[1] 2-wings (0-24) exposed vs unexposed	24	43±5.18 vs 12±1.20
S-10F	Wg[1] 2-wings (24-48) exposed vs unexposed	24	52±2.91 vs 18±1.50
S-10F	His-GFP (24-48) naïve vs unexposed	24	41±1.87 vs 15±1.10
S-10G	His-GFP (0-24) exposed vs unexposed	24	109±2.24 vs 16±1.19
S-10G	His-GFP (24-48) exposed vs unexposed	24	60±3.18 vs 9±0.97
S-10G	Rpr (24-48) naïve vs unexposed	24	46±1.46 vs 11±0.95
S-12A	dnc[ML] (0-24) exposed vs unexposed	24	81±4.15 vs 7±1.35
S-12A	dnc[ML] (24-48) exposed vs unexposed	24	37±1.96 vs 39±1.59
S-12A	His-GFP (24-48) naïve vs unexposed	24	38±1.46 vs 42±1.87
S-12C	His-GFP (0-24) exposed vs unexposed	24	50±2.41 vs 6±0.58
S-12C	His-GFP (24-48) exposed vs unexposed	24	40±1.59 vs 7±0.69
S-12C	dnc[ML] (24-48) naïve vs unexposed	24	40±1.38 vs 68±2.54
S-12B	rut[2080] (0-24) exposed vs unexposed	24	48±2.61 vs 3±0.47
S-12B	rut[2080] (24-48) exposed vs unexposed	24	32±1.76 vs 36±1.80
S-12B	His-GFP (24-48) naïve vs unexposed	24	39±2.27 vs 36±1.97
S-12D	His-GFP (0-24) exposed vs unexposed	24	48±2.26 vs 6±0.81
S-12D	His-GFP (24-48) exposed vs unexposed	24	41±2.24 vs 6±0.97
S-12D	rut[2080] (24-48) naïve vs unexposed	24	41±1.50 vs 60±2.56
S-12E	FMR1[3] (0-24) exposed vs unexposed	24	71±6.80 vs 15±1.79
S-12E	FMR1[3] (24-48) exposed vs unexposed	24	52±3.34 vs 53±3.61
S-12E	His-GFP (24-48) naïve vs unexposed	24	30±2.79 vs 31±2.64
S-12F	His-GFP (0-24) exposed vs unexposed	24	155±6.33 vs 14±1.98
S-12F	His-GFP (24-48) exposed vs unexposed	24	71±3.57 vs 7±0.71
S-12F	FMR1[3] (24-48) naïve vs unexposed	24	59±3.31 vs 56±3.53
S-12G	amn[X8] (0-24) exposed vs unexposed	24	37±2.14 vs 7±0.37
S-12G	amn[X8] (24-48) exposed vs unexposed	24	41±2.64 vs 40±1.96
S-12G	His-GFP (24-48) naïve vs unexposed	24	32±2.08 vs 36±2.09
S-12H	His-GFP (0-24) exposed vs unexposed	24	81±2.88 vs 9±0.90
S-12H	His-GFP (24-48) exposed vs unexposed	24	54±2.86 vs 9±0.80
S-12H	amn[X8] (24-48) naïve vs unexposed	24	51±2.20 vs 65±2.75
S-13A	OK107-GAL4 (0-24) exposed vs unexposed	24	63±2.84 vs 7±0.77
S-13A	OK107-GAL4 (24-48) exposed vs unexposed	24	42±2.33 vs 7±0.90
S-13A	His-GFP (24-48) naïve vs unexposed	24	41±2.37 vs 7±0.68
S-13B	His-GFP (0-24) exposed vs unexposed	24	84±4.19 vs 7±0.61
S-13B	His-GFP (24-48) exposed vs unexposed	24	43±2.54 vs 7±0.88
S-13B	OK107-GAL4 (24-48) naïve vs unexposed	24	45±2.89 vs 6±0.87
S-13C	OK107-GAL4/+ (0-24) exposed vs unexposed	24	89±3.48 vs 9±0.05
S-13C	OK107-GAL4/+ (24-48) exposed vs unexposed	24	63±2.03 vs 7±0.49
S-13C	His-GFP (24-48) naïve vs unexposed	24	54±1.78 vs 8±0.67
S-13D	His-GFP (0-24) exposed vs unexposed	24	98±3.56 vs 9±0.85
S-13D	His-GFP (24-48) exposed vs unexposed	24	45±1.81 vs 6±0.67
S-13D	OK107-GAL4/+ (24-48) naïve vs unexposed	24	55±2.92 vs 6±0.53
S-13E	UAS-Tetx (0-24) exposed vs unexposed	24	83±4.77 vs 19±1.56
S-13E	UAS-Tetx (24-48) exposed vs unexposed	24	52±2.74 vs 6±0.74
S-13E	His-GFP (24-48) naïve vs unexposed	24	42±2.01 vs 8±0.83
S-13F	His-GFP (0-24) exposed vs unexposed	24	94±4.01 vs 11±1.36
S-13F	His-GFP (24-48) exposed vs unexposed	24	44±2.28 vs 6±0.59
S-13F	UAS-Tetx (24-48) naïve vs unexposed	24	51±2.62 vs 10±0.90
S-13G	UAS-Tetx/+ (0-24) exposed vs unexposed	24	117±4.46 vs 9±1.03
S-13G	UAS-Tetx/+ (24-48) exposed vs unexposed	24	54±1.78 vs 6±0.51
S-13G	His-GFP (24-48) naïve vs unexposed	24	53±2.09 vs 9±1.05
S-13H	His-GFP (0-24) exposed vs unexposed	24	107±3.01 vs 4±0.54
S-13H	His-GFP (24-48) exposed vs unexposed	24	54±1.80 vs 8±0.85
S-13H	UAS-Tetx/+ (24-48) naïve vs unexposed	24	57±1.84 vs 8±0.76
S-13I	TeTx (0-24) exposed vs unexposed	24	130±3.98 vs 16±0.95
S-13I	TeTx (24-48) exposed vs unexposed	24	59±2.78 vs 71±2.03
S-13I	His-GFP (24-48) naïve vs unexposed	24	48±2.57 vs 57±2.53
S-13J	His-GFP (0-24) exposed vs unexposed	24	84±3.86 vs 9±1.07
S-13J	His-GFP (24-48) exposed vs unexposed	24	52±2.02 vs 9±0.87
S-13J	Tetx (24-48) naïve vs unexposed	24	50±1.17 vs 50±2.27
S-13K	His-GFP (0-24) exposed vs unexposed	24	122±4.30 vs 15±2.21
S-13K	His-GFP (24-48) exposed vs unexposed	24	73±3.63 vs 10±1.00
S-13K	Tetx (24-48) naïve vs unexposed	24	59±2.48 vs 87±4.24
S-14A	UAS-Orb2 [RNAi] (0-24) exposed vs unexposed	24	59±3.27 vs 7±0.61
S-14A	UAS-Orb2 [RNAi] (24-48) exposed vs unexposed	24	43±1.64 vs 6±0.56
S-14A	His-GFP (24-48) naïve vs unexposed	24	45±2.68 vs 8±0.75
S-14B	His-GFP (0-24) exposed vs unexposed	24	106±4.65 vs 11±1.23
S-14B	His-GFP (24-48) exposed vs unexposed	24	47±1.87 vs 4±0.62
S-14B	UAS-Orb2[RNAi] (24-48) naïve vs unexposed	24	46±1.53 vs 4±0.35
S-14C	white [RNAi] (0-24) exposed vs unexposed	24	88±3.16 vs 10±0.78
S-14C	white [RNAi] (24-48) exposed vs unexposed	24	57±2.64 vs 8±0.57
S-14C	His-GFP (24-48) naïve vs unexposed	24	53±2.28 vs 9±0.60
S-14D	His-GFP (0-24) exposed vs unexposed	24	70±3.79 vs 6±0.56
S-14D	His-GFP (24-48) exposed vs unexposed	24	54±1.92 vs 6±0.58
S-14D	white [RNAi] (24-48) naïve vs unexposed	24	54±1.86 vs 7±0.06
S-15A	MB Gene-switch (0-24) exposed vs unexposed	24	53±2.38 vs 6±0.76
S-15A	MB Gene-switch (24-48) exposed vs unexposed	24	56±2.28 vs 7±0.65
S-15A	His-GFP (24-48) naïve vs unexposed	24	54±2.84 vs 9±0.84
S-15B	His-GFP (0-24) exposed vs unexposed	24	86±3.07 vs 8±0.82
S-15B	His-GFP (24-48) exposed vs unexposed	24	63±2.62 vs 8±0.66
S-15B	MB Gene-switch (24-48) naïve vs unexposed	24	62±2.08 vs 7±0.64
S-15C	MB Gene-switch/+ (0-24) exposed vs unexposed	24	86±4.35 vs 13±1.38
S-15C	MB Gene-switch/+ (24-48) exposed vs unexposed	24	59±2.58 vs 6±0.45
S-15C	His-GFP (24-48) naïve vs unexposed	24	58±2.13 vs 9±1.01
S-15D	His-GFP (0-24) exposed vs unexposed	24	107±3.64 vs 6±1.05
S-15D	His-GFP (24-48) exposed vs unexposed	24	55±2.22 vs 6±0.62
S-15D	MB Gene-switch/+ (24-48) naïve vs unexposed	24	54±2.02 vs 7±0.53
S-16A	white [RNAi] +RU486 (0-24) exposed vs unexposed	24	97±3.76 vs 2±0.45
S-16A	white [RNAi] +RU486 (24-48) exposed vs unexposed	24	46±2.83 vs 5±0.68
S-16A	His-GFP (24-48) +RU486 naïve vs unexposed	24	47±2.66 vs 6±0.64
S-16B	His-GFP (0-24) +RU486 exposed vs unexposed	24	110±2.89 vs 1±0.17
S-16B	His-GFP (24-48) +RU486 exposed vs unexposed	24	46±2.29 vs 2±0.53
S-16B	white [RNAi] +RU486 (24-48) naïve vs unexposed	24	53±2.01 vs 2±0.53
S-16C	white [RNAi] +methanol (0-24) exposed vs unexposed	24	74±3.48 vs 3±0.51
S-16C	white [RNAi] +methanol (24-48) exposed vs unexposed	24	60±2.24 vs 4±0.50
S-16C	His-GFP (24-48) +methanol naïve vs unexposed	24	52±2.35 vs 8±0.76
S-16D	His-GFP (0-24) +methanol exposed vs unexposed	24	91±4.81 vs 5±0.43
S-16D	His-GFP (24-48) +methanol exposed vs unexposed	24	47±2.01 vs 3±0.37
S-16D	white [RNAi] +methanol (24-48) naïve vs unexposed	24	47±2.87 vs 3±0.44
