# Supplementary figures and images for: Social communication of predator-induced changes in Drosophila behavior and germ line physiology
Source: eLife journal article supplement (doi:10.7554/elife.07423), 2015-05-13

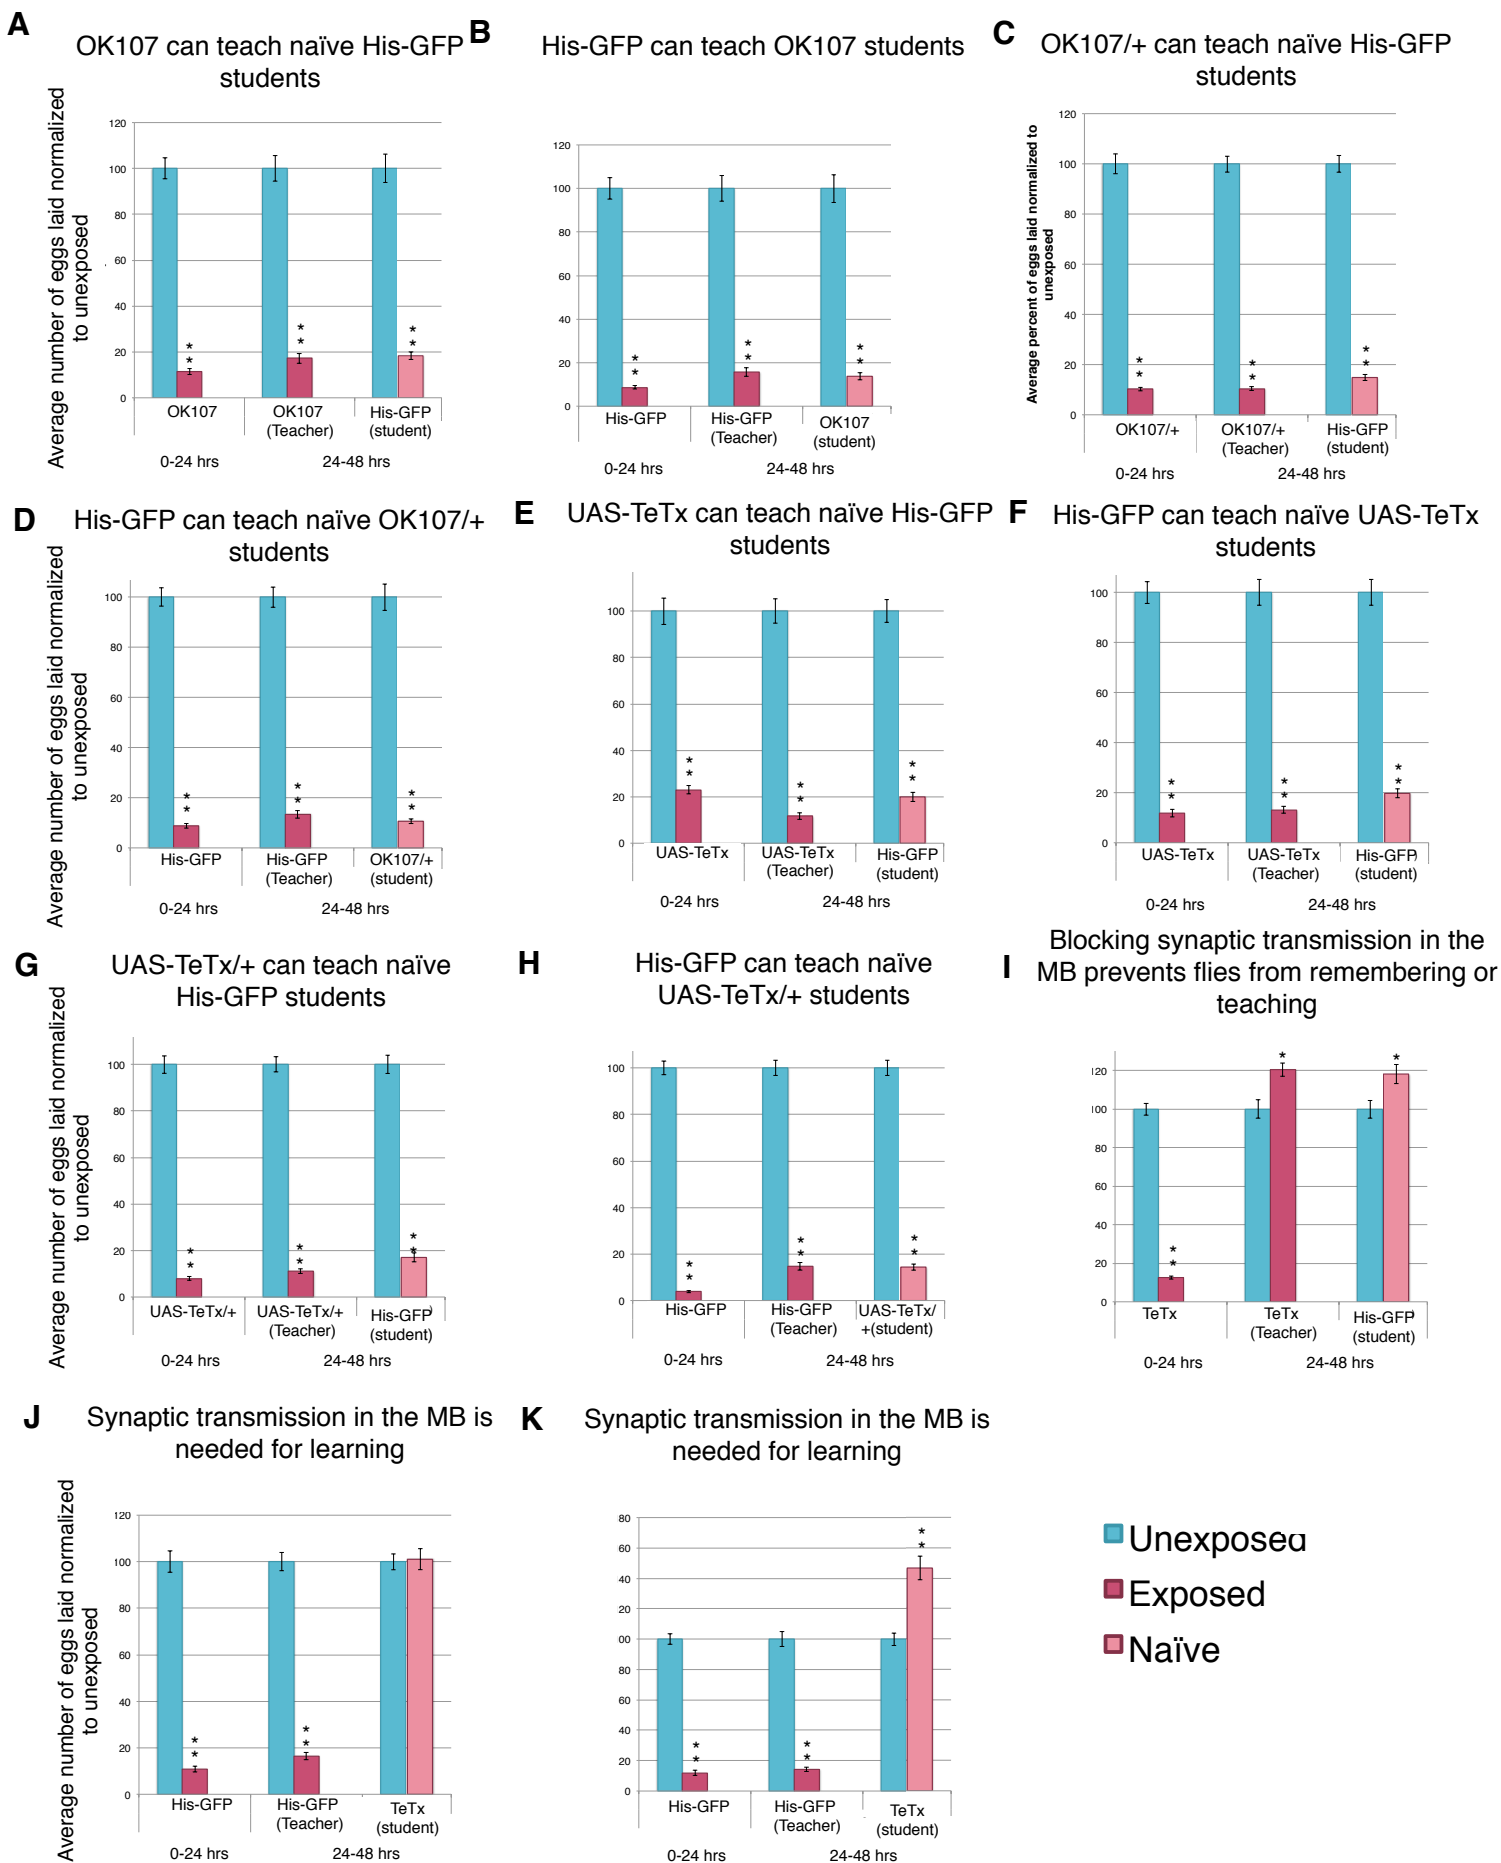

Supplement: supp [file elife-07423-supp-v2.zip]

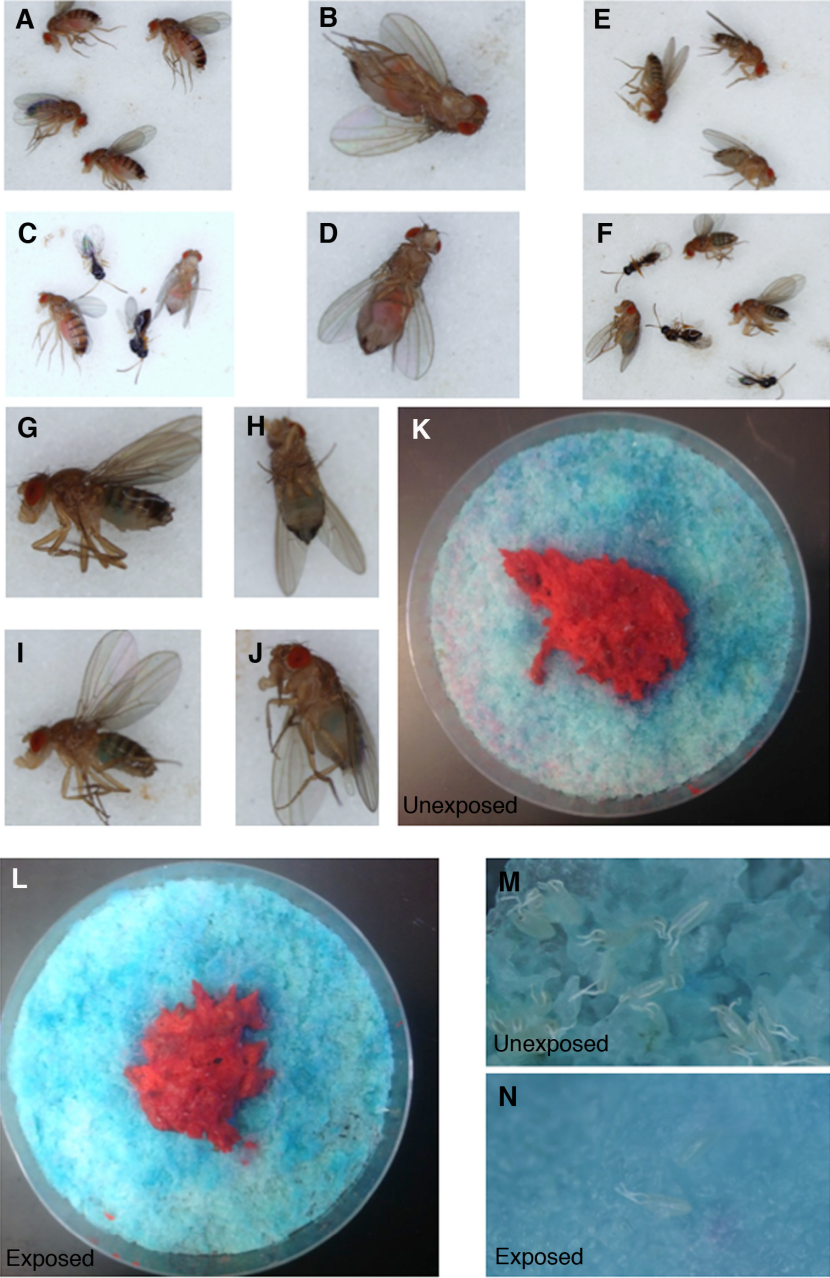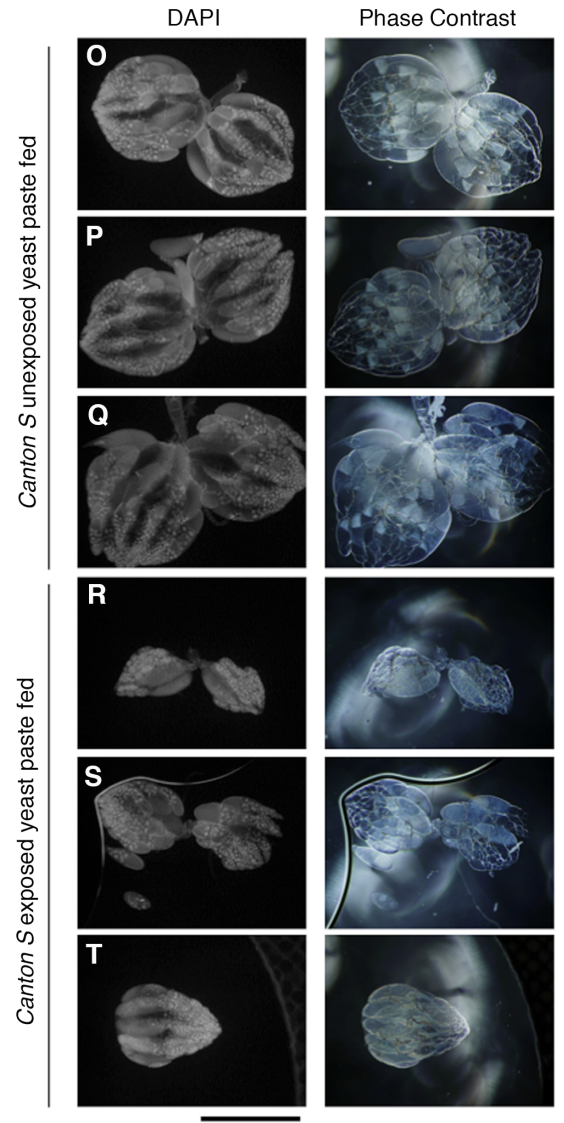

Supplement: supp [file elife-07423-supp-v2.zip]
